# Supplementary material for: Circulating microRNA Biomarker for Detecting Breast Cancer in High-Risk Benign Breast Tumors
Source: MDPI journal article supplement (doi:10.3390/ijms24087553), 2023-04-20
Supplement: s1 [file s1]

## Supplementary Table S3. Association between miRNA and its target genes

| MirGeneDB ID       | CA                                |                                        | HB                                           |                             |
|--------------------|-----------------------------------|----------------------------------------|----------------------------------------------|-----------------------------|
|                    | Positive                          | Negative                               | Positive                                     | Negative                    |
| Hsa-Mir-10-P2c_5p  | <i>PTPRJ</i>                      |                                        | <i>F13A1, HABP2</i>                          | <i>TUBB</i>                 |
| Hsa-Mir-122_5p     | <i>C1RL, PTPRJ, ANTXR1</i>        | <i>YWHAQ</i>                           | <i>F13A1, TUBA4A</i>                         |                             |
| Hsa-Mir-128-P1_3p  |                                   | <i>KRT2, ITGB3, LAMB1, RAP1B, CTSS</i> | <i>LTF</i>                                   | <i>YWHAQ</i>                |
| Hsa-Mir-130-P1c_3p | <i>MYH9, IGFBP3, CNTN1</i>        | <i>ALDOA</i>                           | <i>LAMB1</i>                                 |                             |
| Hsa-Mir-130-P4a_5p |                                   | <i>PZP</i>                             |                                              | <i>LTF</i>                  |
| Hsa-Mir-15-P1a_5p  | <i>SPTB</i>                       | <i>KRT10, KRT2, CTSS</i>               |                                              | <i>FLNA</i>                 |
| Hsa-Mir-15-P1c_5p  | <i>HBG2</i>                       | <i>ATRN, HABP2, MEGF8</i>              |                                              | <i>TGFBI, ZYX</i>           |
| Hsa-Mir-17-P4a_5p  |                                   | <i>C1RL, LAMB1, NRP1</i>               |                                              | <i>HABP2</i>                |
| Hsa-Mir-185_5p     |                                   | <i>PGLYRP2, C1RL, LAMB1, SPARCL1</i>   | <i>SPTB, LTF</i>                             | <i>ITGB3, ACTBL2, IGF2R</i> |
| Hsa-Mir-19-P2a_3p  | <i>PZP</i>                        | <i>KRT2, LAMB1</i>                     |                                              | <i>FLNA, TGFBI</i>          |
| Hsa-Mir-19-P2c_3p  | <i>PZP</i>                        | <i>KRT2, LAMB1</i>                     |                                              | <i>FLNA, TGFBI</i>          |
| Hsa-Mir-28-P1_5p   |                                   | <i>PZP</i>                             | <i>VCL, HSPA8, ITGB3, PKM, ACTBL2, IGF2R</i> | <i>SPTB, LTF, NRP1</i>      |
| Hsa-Mir-877_3p*    | <i>LAMB1, NRP1</i>                |                                        |                                              | <i>LTF, SELENBP1</i>        |
| Hsa-Mir-885_5p     | <i>LCP1, C1RL, PLXDC2, ANTXR1</i> | <i>PKM</i>                             | <i>TUBA4A, IGF1</i>                          | <i>HSPA8, PKM</i>           |
| Hsa-Mir-95-P2_3p   | <i>CNTN1</i>                      | <i>NRP1</i>                            | <i>SPTB, ITGB3, LTF</i>                      | <i>FLNA, PKM, ACTBL2</i>    |
