# Supplementary material for: Circulating microRNA Biomarker for Detecting Breast Cancer in High-Risk Benign Breast Tumors
Source: MDPI journal article supplement (doi:10.3390/ijms24087553), 2023-04-20
Supplement: s1 [file s1]

**Supplementary Table S4. Information of the Identified miRNAs**

| MirGeneDB                 | miRBase                | Family         | Chromosome | Seed                    | Sequences of identified biomarkers | Note           |
|---------------------------|------------------------|----------------|------------|-------------------------|------------------------------------|----------------|
| Hsa-Mir-10-P2c_5p         | hsa-mir-99a-5p         | MIR-10         | 21         | <a href="#">ACCCGUA</a> |                                    |                |
| Hsa-Mir-122_5p            | hsa-mir-122-5p         | MIR-122        | 18         | <a href="#">GGAGUGU</a> |                                    |                |
| <b>Hsa-Mir-128-P1_3p</b>  | <b>hsa-mir-128-3p</b>  | <b>MIR-128</b> | <b>3</b>   | <a href="#">CACAGUG</a> | ucacagugaaccggucucuuu              |                |
| Hsa-Mir-130-P1c_3p        | hsa-mir-130a-3p        | MIR-130        | 11         | <a href="#">AGUGCAA</a> |                                    |                |
| <b>Hsa-Mir-130-P4a_5p</b> | <b>hsa-mir-130b-5p</b> | <b>MIR-130</b> | <b>22</b>  | <a href="#">CUCUUUC</a> | acucuuucccuguugcacuac              |                |
| Hsa-Mir-15-P1a_5p         | hsa-mir-15a-5p         | MIR-15         | 13         | <a href="#">AGCAGCA</a> |                                    |                |
| Hsa-Mir-15-P1c_5p         | hsa-mir-424-5p         | MIR-15         | X          | <a href="#">AGCAGCA</a> |                                    |                |
| Hsa-Mir-17-P2a_5p         | hsa-mir-18a-5p         | MIR-17         | 13         | <a href="#">AAGUGUC</a> |                                    |                |
| Hsa-Mir-17-P4a_5p         | hsa-mir-20a-5p         | MIR-17         | 13         | <a href="#">AAAGUGC</a> |                                    |                |
| Hsa-Mir-185_5p            | hsa-mir-185-5p         | MIR-185        | 22         | <a href="#">GGAGAGA</a> |                                    |                |
| <b>Hsa-Mir-192-P1_5p</b>  | <b>hsa-mir-215-5p</b>  | <b>MIR-192</b> | <b>1</b>   | <a href="#">UGACCUA</a> | augaccuagaauugacagac               |                |
| Hsa-Mir-19-P2a_3p         | hsa-mir-19b-3p (19b-1) | MIR-19         | 13         | <a href="#">GUGCAAA</a> |                                    |                |
| Hsa-Mir-19-P2c_3p         | hsa-mir-19b-3p (19b-2) | MIR-19         | X          | <a href="#">GUGCAAA</a> |                                    |                |
| <b>Hsa-Mir-28-P1_5p</b>   | <b>hsa-mir-28-5p</b>   | <b>MIR-28</b>  | <b>3</b>   | <a href="#">AGGAGCU</a> | aaggagcucacagucuuugag              |                |
| Hsa-Mir-3613_5p           | hsa-mir-3613-5p        | MIR-3613       | 13         | <a href="#">GUUGUAC</a> |                                    |                |
| Hsa-Mir-361-v1_3p*        | hsa-mir-361-3p         | MIR-361        | X          | <a href="#">UAUCAGA</a> |                                    |                |
| Hsa-Mir-362-P1_5p         | hsa-mir-362-5p         | MIR-362        | X          | <a href="#">AUCCUUG</a> |                                    |                |
| Hsa-Mir-877_3p*           | hsa-mir-877-3p         | MIR-877        | 6          | <a href="#">UAGAGGA</a> |                                    |                |
| Hsa-Mir-885_5p            | hsa-mir-885-5p         | MIR-885        | 3          | <a href="#">CCAUUAC</a> |                                    |                |
| <b>Hsa-Mir-8-P2a_3p</b>   | <b>hsa-mir-200a-3p</b> | <b>MIR-8</b>   | <b>1</b>   | <a href="#">AACACUG</a> | uaacacugucugguaa <b>cgaugu</b>     | miR-200 family |
| <b>Hsa-Mir-8-P2b_3p</b>   | <b>hsa-mir-141-3p</b>  | <b>MIR-8</b>   | <b>12</b>  | <a href="#">AACACUG</a> | uaacacugucugguaa <b>agaugg</b>     | miR-200 family |
| <b>Hsa-Mir-95-P2_3p</b>   | <b>hsa-mir-421</b>     | <b>MIR-95</b>  | <b>X</b>   | <a href="#">UCAACAG</a> | aucaacagacauuaauugggcgc            |                |
