# Supplementary material for: Circulating microRNA Biomarker for Detecting Breast Cancer in High-Risk Benign Breast Tumors
Source: MDPI journal article supplement (doi:10.3390/ijms24087553), 2023-04-20

## The Area Under the Curve (AUC) Plots

### 1. miRBase ID: hsa-mir-215-5p

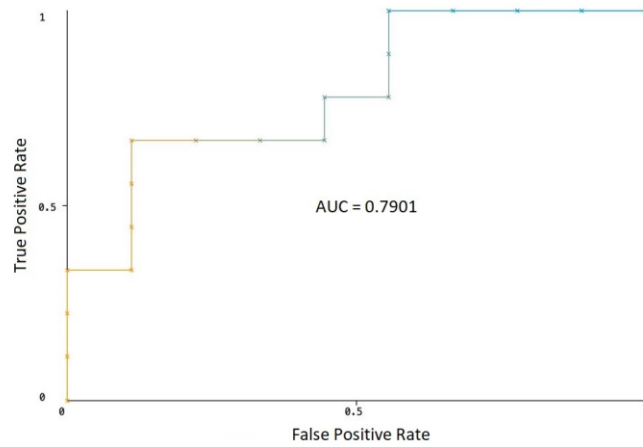

### 2. miRBase ID: hsa-mir-200a-3p

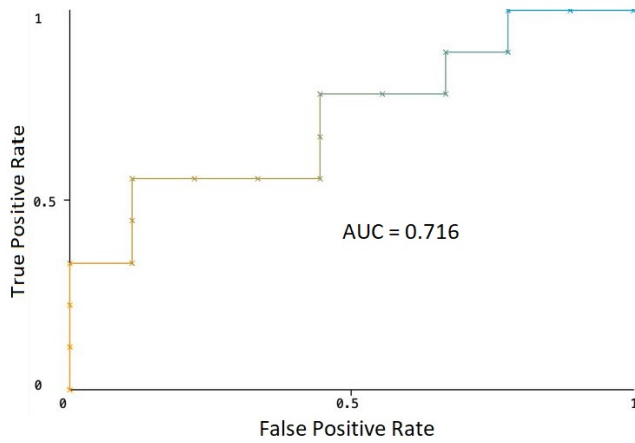

### 3. miRBase ID: hsa-mir-141-3p

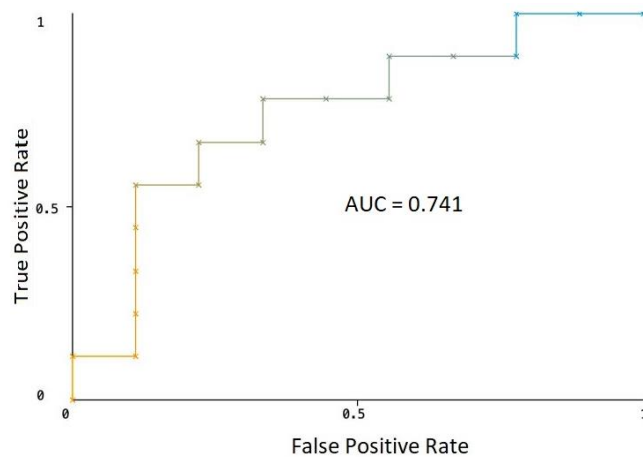

4. miRBase ID: hsa-mir-215-5p and hsa-mir-200a-3p

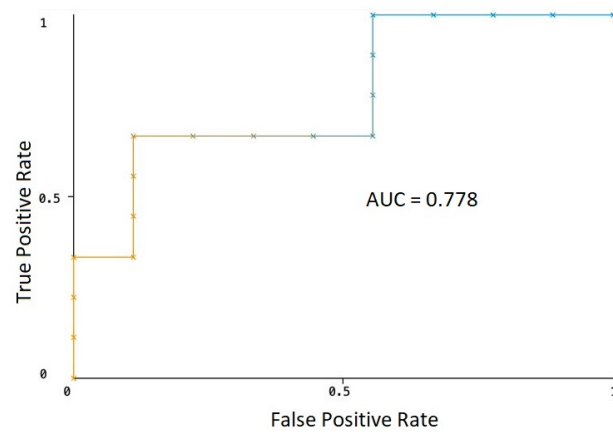

5. miRBase ID: hsa-mir-215-5p and hsa-mir-141-3p

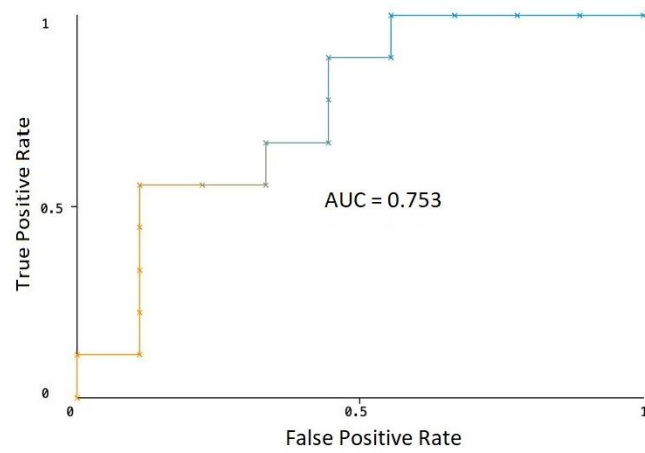

6. miRBase ID: hsa-mir-128-3p

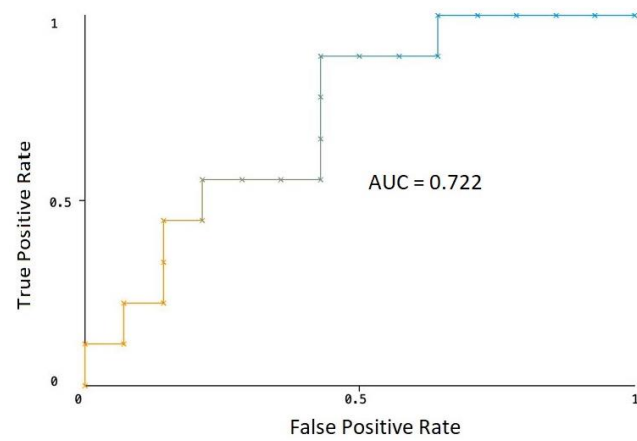

7. miRBase ID: hsa-mir-130b-5p

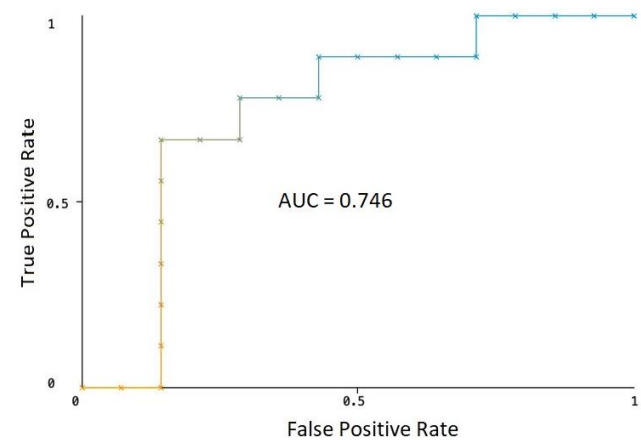

8. miRBase ID: hsa-mir-28-5p

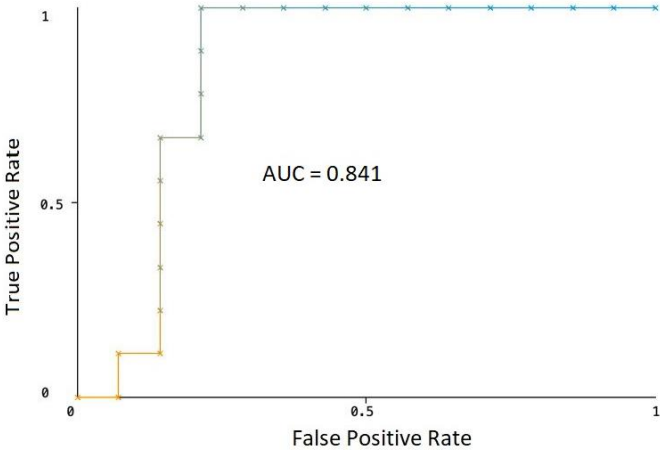

9. miRBase ID: hsa-mir-421

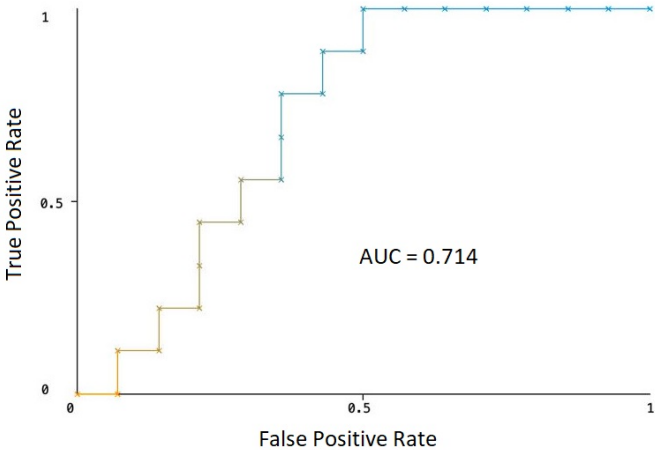

10. miRBase ID: hsa-mir-28-5p and hsa-mir-421

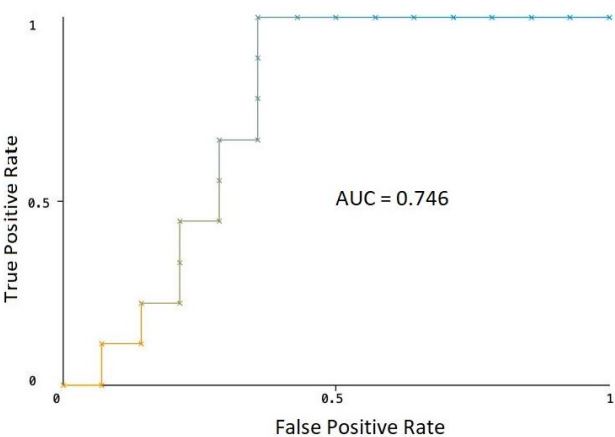

11. miRBase ID: hsa-mir-130b-5p, hsa-mir-28-5p and hsa-mir-421

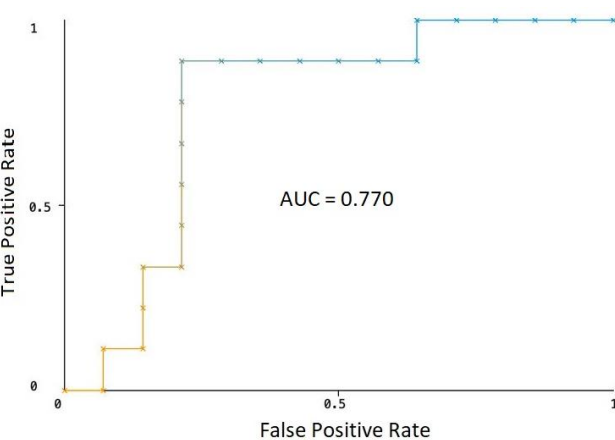

Supplement: s1 [file s1]
