# Supplementary material for: Circulating microRNA Biomarker for Detecting Breast Cancer in High-Risk Benign Breast Tumors
Source: MDPI journal article supplement (doi:10.3390/ijms24087553), 2023-04-20
Supplement: s1 [file s1]

Supplementary Table S1. Sample information

| Case ID | Gender | Race  | BMI | Smoking Status | Age at Sample Acquisition | Histologic Type                                                                                       | Histologic Category   |                      |
|---------|--------|-------|-----|----------------|---------------------------|-------------------------------------------------------------------------------------------------------|-----------------------|----------------------|
| HB1     | F      | White | 34  | Never          | 51                        | Atypical Ductal Hyperplasia                                                                           | ADH                   | High-risk benign     |
| HB2     | F      | White | 23  | Never          | 67                        | Atypical Ductal Hyperplasia                                                                           | ADH                   |                      |
| HB3     | F      | White | 24  | Former         | 70                        | Atypical Ductal Hyperplasia involving papilloma                                                       | ADH                   |                      |
| HB4     | F      | White | 29  | Former         | 61                        | Atypical Lobular Hyperplasia                                                                          | ALH                   |                      |
| HB5     | F      | White | 33  | Never          | 65                        | Atypical Lobular Hyperplasia and papilloma                                                            | ALH                   |                      |
| HB6     | F      | White | 25  | Never          | 51                        | Flat Epithelial Atypia, fibrocystic changes, usual ductal hyperplasia                                 | FEA                   |                      |
| HB7     | F      | White | 21  | Never          | 45                        | Flat Epithelial Atypia, focal microcalcifications, fibrocystic change, focal usual ductal hyperplasia | FEA                   |                      |
| HB8     | F      | White | 31  | Former         | 61                        | Focal Atypical Lobular Hyperplasia                                                                    | ALH                   |                      |
| HB9     | F      | White | 22  | Never          | 73                        | Focal Atypical Lobular Hyperplasia and focal ductal hyperplasia with microcalcifications              | ALH                   |                      |
| HB10    | F      | White | 23  | Never          | 50                        | Focal Flat Epithelial Atypia                                                                          | FEA                   |                      |
| HB11    | F      | White | 19  | Never          | 51                        | Focal Flat Epithelial Atypia, focal radial scar, usual ductal hyperplasia                             | FEA                   |                      |
| HB12    | F      | White | 30  | Never          | 49                        | Atypical Ductal Hyperplasia                                                                           | ADH                   |                      |
| HB13    | F      | White | 26  | Never          | 48                        | Multifocal Flat Epithelial Atypia                                                                     | FEA                   |                      |
| HB14    | F      | White | NA  | NA             | 47                        | Right breast Atypical Ductal Hyperplasia, Left breast Atypical Lobular Hyperplasia                    | ADH                   |                      |
| MB1     | F      | White | 35  | Never          | 65                        | Benign breast parenchyma, columnar cell change, usual ductal hyperplasia, intraductal papilloma       | Intraductal papilloma | Moderate-risk benign |
| MB2     | F      | White | 24  | Never          | 62                        | Fibrocystic changes, usual ductal hyperplasia, small intraductal papilloma                            | Intraductal papilloma |                      |
| MB3     | F      | White | 20  | Never          | 38                        | Radial scar, sclerosing adenosis, fibrocystic changes, focal duct hyperplasia                         | Radial scar           |                      |
| MB4     | F      | White | 32  | Current        | 72                        | Small intraductal papilloma                                                                           | Intraductal papilloma |                      |
| Be1     | F      | White | 20  | Never          | 52                        | Benign breast tissue, stromal fibrosis, small fibroadenomas                                           | FA                    | No-risk benign       |
| Be2     | F      | White | 30  | Former         | 63                        | Benign breast tissue, focal fibrocystic changes                                                       | Fibrocystic change    |                      |
| Be3     | F      | White | 29  | Former         | 42                        | Fibroadenoma                                                                                          | FA                    |                      |
| Be4     | F      | White | NA  | Former         | 50                        | Fibroadenoma                                                                                          | FA                    |                      |
| Be5     | F      | White | NA  | Former         | 54                        | Fibroadenoma                                                                                          | FA                    |                      |
| Be6     | F      | White | NA  | NA             | 63                        | Fibroadenoma                                                                                          | FA                    |                      |
| Be7     | F      | White | 23  | Never          | 41                        | Fibrocystic changes, fibroadenomatoid mastopathy, focal microcalcifications                           | Fibrocystic change    |                      |
| Be8     | F      | White | 31  | Never          | 65                        | fibrocystic change, microcalcifications                                                               | Fibrocystic change    |                      |
| Be9     | F      | White | 23  | Former         | 58                        | Microcalcifications, fibrocystic changes, benign ducts and lobules                                    | Fibrocystic change    |                      |

| Case ID | Gender | Race  | BMI | Smoking Status | Age at Sample Acquisition | Histologic Type                                     | Histologic Category | pTNM-Stage | pT    | pN      | pM     | Grade   | ER  | PR  | HER2     | Subtype |
|---------|--------|-------|-----|----------------|---------------------------|-----------------------------------------------------|---------------------|------------|-------|---------|--------|---------|-----|-----|----------|---------|
| CA1     | F      | White | 30  | Current        | 42                        | Invasive ductal carcinoma, NOS                      | IDC                 | I          | pT1a  | pN0     | pM: NA | Grade 1 | Pos | Pos | Neg      | LA      |
| CA2     | F      | White | 29  | Former         | 62                        | Invasive ductal carcinoma, NOS                      | IDC                 | I          | pT1a  | pN0     | pM: NA | Grade 1 | Pos | Pos | Neg      | LA      |
| CA3     | F      | White | 38  | Former         | 47                        | Invasive papillary carcinoma                        | IDC                 | I          | pT1a  | pN0(sn) | pM: NA | Grade 1 | Pos | Pos | Neg (1+) | LA      |
| CA4     | F      | White | 32  | Never          | 67                        | Invasive ductal carcinoma with metaplastic features | MC                  | I          | pT1b  | pN0     | pM: NA | Grade 3 | Neg | Neg | Neg      | TN      |
| CA5     | F      | White | 33  | Current        | 40                        | Metaplastic carcinoma, spindle cell type            | MC                  | I          | pT1a  | pN0     | pM: NA | Grade 3 | Neg | Neg | Neg      | TN      |
| CA6     | F      | White | 30  | Former         | 66                        | Invasive ductal carcinoma, NOS                      | IDC                 | I          | pT1b  | pN0(sn) | pM: NA | Grade 1 | Pos | Pos | Neg      | LA      |
| CA7     | F      | White | 29  | Former         | 64                        | Invasive ductal carcinoma, NOS                      | IDC                 | I          | pT1b  | pN0(sn) | pM: NA | Grade 3 | Neg | Neg | Neg      | TN      |
| CA8     | F      | White | 18  | Former         | 55                        | Invasive lobular carcinoma                          | ILC                 | I          | pT1b  | pN0     | pM: NA | Grade 1 | Pos | Pos | Neg      | LA      |
| CA9     | F      | White | 21  | Former         | 61                        | Ductal carcinoma <i>in situ</i>                     | DCIS                | 0          | ypTis | ypN0    | pM: NA | NA      | Neg | Neg | Neg      | TN      |

Note: CA9 was treated with neoadjuvant therapy after blood collection.

: Sample used for proteomics.
