# Supplementary material for: Circulating microRNA Biomarker for Detecting Breast Cancer in High-Risk Benign Breast Tumors
Source: Int J Mol Sci. 2023 Apr 20;24(8):7553. doi: 10.3390/ijms24087553 (PMC10142546; doi:10.3390/ijms24087553)
Supplement: Supplementary file 1 [file ijms-24-07553-s001.zip]

Archive with 5 entries (5 files):
- Supplementary Figure S1. The Area Under the Curve.pdf
- Supplementary Table S1. Sample information_mj.pdf
- Supplementary Table S2. Differential Expression of miRNAs_mj.xlsx
- Supplementary Table S3. Association between miRNA and its target genes_mj.pdf
- Supplementary Table S4r. Information of the Identified miRNAs.pdf
