# Supplementary material for: Circulating microRNA Biomarker for Detecting Breast Cancer in High-Risk Benign Breast Tumors
Source: Int J Mol Sci. 2023 Apr 20;24(8):7553. doi: 10.3390/ijms24087553 (PMC10142546; doi:10.3390/ijms24087553)
Supplement: Supplementary file 1 [file ijms-24-07553-s001.zip › Supplementary Table S2. Differential Expression of miRNAs_mj.xlsx]

## Sheet: A_CA_Vs_Be
	baseMean	log2FoldChange	lfcSE	stat	pvalue	padj	Regulation
Hsa-Mir-8-P2b_3p	52.7453	-1.44197	0.387593	-3.72032	0.000198973	0.0547512	Down
Hsa-Mir-192-P1_5p	32.0364	-1.6151	0.451741	-3.57528	0.000349848	0.0547512	Down
Hsa-Mir-1908_5p	192.674	0.980157	0.348853	2.80966	0.00495941	0.517432	Up
Hsa-Mir-8-P2a_3p	29.6928	-0.908895	0.343372	-2.64697	0.00812168	0.589301	Down
Hsa-Mir-130-P2b_3p	111.401	-0.839837	0.323431	-2.59665	0.00941375	0.589301	Down
Hsa-Mir-95-P1_3p	21.8321	-0.808275	0.333113	-2.42643	0.0152482	0.752107	Down
Hsa-Mir-423_3p	5290.44	0.548295	0.229354	2.39061	0.0168203	0.752107	Up
Hsa-Mir-17-P4a_5p	3938.67	-0.672538	0.288417	-2.33182	0.01971	0.755773	Down
Hsa-Mir-17-P2a_5p	302.414	-0.474823	0.208772	-2.27436	0.0229446	0.755773	Down
Hsa-Mir-95-P2_3p	273.755	-0.434262	0.195271	-2.22389	0.0261557	0.755773	Down
Hsa-Mir-15-P2d_5p	21.7288	-0.956545	0.44105	-2.16879	0.0300988	0.755773	Down
Hsa-Mir-362-P1_5p	25.2636	0.651185	0.307983	2.11436	0.0344848	0.755773	Up
Hsa-Mir-130-P1c_3p	554.86	-0.486325	0.230848	-2.10669	0.0351447	0.755773	Down
Hsa-Mir-181-P1b_3p*	167.552	0.440988	0.210043	2.09951	0.0357718	0.755773	Up
Hsa-Mir-221-P1a_3p	1354.55	0.403238	0.204073	1.97595	0.0481609	0.755773	Up
Hsa-Mir-26-P2_5p	18293.7	-0.39135	0.198242	-1.9741	0.0483698	0.755773	Down
Hsa-Mir-10-P2c_5p	164.905	0.544543	0.276587	1.96879	0.0489768	0.755773	Up
Hsa-Mir-27-P3_3p	690.349	-0.656813	0.34596	-1.89852	0.0576272	0.755773	Down
Hsa-Mir-214-v1_3p	12.5856	-0.920972	0.485978	-1.89509	0.0580804	0.755773	Down
Hsa-Mir-130-P4a_5p	75.8158	0.422356	0.224459	1.88166	0.0598821	0.755773	Up
Hsa-Mir-193-P1a_5p*	23.5307	1.09875	0.59011	1.86195	0.0626106	0.755773	Up
Hsa-Mir-339_5p	1342.16	0.361363	0.197976	1.82529	0.0679576	0.755773	Up
Hsa-Let-7-P2a3_5p	20018.4	0.444483	0.248402	1.78937	0.0735547	0.755773	Up
Hsa-Mir-128-P1_3p	602.483	-0.248387	0.140311	-1.77026	0.0766833	0.755773	Down
Hsa-Mir-30-P1b_5p	787.988	-0.463881	0.262519	-1.76703	0.0772224	0.755773	Down
Hsa-Let-7-P2b1_5p	17665.3	0.410421	0.236047	1.73872	0.0820833	0.755773	Up
Hsa-Mir-122_5p	38823.9	0.91108	0.524041	1.73857	0.0821111	0.755773	Up
Hsa-Mir-375_3p	380.894	-0.742179	0.429373	-1.72852	0.0838954	0.755773	Down
Hsa-Mir-328_3p	1843.31	0.460676	0.267064	1.72497	0.0845336	0.755773	Up
Hsa-Mir-181-P2c_5p	84.2933	0.698332	0.406904	1.71621	0.0861239	0.755773	Up
Hsa-Mir-21_5p	13854.5	0.27375	0.161021	1.70009	0.0891144	0.755773	Up
Hsa-Mir-15-P1c_5p	41.5377	-0.860639	0.507102	-1.69717	0.0896645	0.755773	Down
Hsa-Mir-130-P3b_3p	872.151	-0.382186	0.229369	-1.66625	0.0956632	0.755773	Down
Hsa-Mir-491_5p	74.0377	0.464528	0.279853	1.6599	0.0969348	0.755773	Up
Hsa-Mir-139_5p	83.8792	-0.516934	0.314407	-1.64415	0.100145	0.755773	Down
Hsa-Mir-3138_3p	45.3814	0.528902	0.323125	1.63683	0.101665	0.755773	Up
Hsa-Mir-15-P1b_3p*	217.868	-0.48585	0.300262	-1.61808	0.105645	0.755773	Down
Hsa-Mir-199-P2-v1_5p*	16.0516	-0.766847	0.483612	-1.58567	0.112815	0.755773	Down
Hsa-Mir-127_3p	599.088	0.730288	0.464085	1.57361	0.115579	0.755773	Up
Hsa-Mir-30-P2a_5p	108.941	-0.530034	0.339721	-1.5602	0.118712	0.755773	Down
Hsa-Mir-345_5p	176.984	-0.298675	0.19214	-1.55447	0.120073	0.755773	Down
Hsa-Mir-181-P1a_5p	1804.04	0.383507	0.246911	1.55322	0.12037	0.755773	Up
Hsa-Mir-181-P1b_5p	1804.11	0.383289	0.246873	1.55257	0.120525	0.755773	Up
Hsa-Mir-23-P3_3p	5605.28	-0.45523	0.293529	-1.55088	0.12093	0.755773	Down
Hsa-Mir-133-P1-v1_3p	51.414	-0.671564	0.435145	-1.54331	0.122756	0.755773	Down
Hsa-Mir-133-P3-v1_3p	51.414	-0.671564	0.435145	-1.54331	0.122756	0.755773	Down
Hsa-Mir-877_3p*	13.4142	0.808802	0.52483	1.54107	0.123299	0.755773	Up
Hsa-Mir-10-P3c_5p	518.004	-0.49736	0.326752	-1.52213	0.127976	0.755773	Down
Hsa-Mir-361-v1_5p	1549.2	-0.257166	0.170006	-1.51269	0.130359	0.755773	Down
Hsa-Mir-10-P3d_5p	519.921	-0.488373	0.3261	-1.49762	0.134232	0.755773	Down
Hsa-Mir-1307_3p*	2726.33	0.477657	0.319234	1.49626	0.134585	0.755773	Up
Hsa-Mir-24-P3_3p	2413.05	-0.409107	0.276246	-1.48095	0.13862	0.755773	Down
Hsa-Mir-671_3p	81.2651	0.541396	0.365816	1.47997	0.138882	0.755773	Up
Hsa-Mir-24-P2_3p	2448.35	-0.410717	0.278431	-1.47511	0.140183	0.755773	Down
Hsa-Mir-142-P1-v1_5p	6957.95	-0.328157	0.223044	-1.47127	0.141219	0.755773	Down
Hsa-Mir-15-P1d_5p	9.73856	-0.857825	0.585796	-1.46438	0.143091	0.755773	Down
Hsa-Mir-30-P2d_5p	360.69	-0.366293	0.25066	-1.46132	0.143929	0.755773	Down
Hsa-Mir-30-P2b_5p	360.73	-0.36629	0.250784	-1.46058	0.144132	0.755773	Down
Hsa-Mir-432_5p	1659.94	0.714858	0.490031	1.4588	0.14462	0.755773	Up
Hsa-Let-7-P2c2_5p	42123.1	0.258322	0.178223	1.44944	0.147216	0.755773	Up
Hsa-Mir-128-P2_3p	861.266	-0.20817	0.147868	-1.40781	0.159188	0.755773	Down
Hsa-Mir-186_5p	2402.27	-0.231338	0.164741	-1.40425	0.160244	0.755773	Down
Hsa-Mir-181-P2b_5p	300.634	0.355497	0.253331	1.40329	0.16053	0.755773	Up
Hsa-Mir-223_3p	50728.3	-0.420758	0.301445	-1.3958	0.162774	0.755773	Down
Hsa-Mir-194-P2_5p	270.822	-0.468033	0.336522	-1.3908	0.164288	0.755773	Down
Hsa-Let-7-P2c1_5p	9063.42	-0.256648	0.185603	-1.38278	0.166733	0.755773	Down
Hsa-Mir-194-P1_5p	263.124	-0.460078	0.333156	-1.38097	0.167289	0.755773	Down
Hsa-Mir-574_3p	221.922	-0.390619	0.284305	-1.37395	0.169458	0.755773	Down
Hsa-Mir-370_3p	307.924	0.608466	0.445198	1.36673	0.171709	0.755773	Up
Hsa-Mir-132-P1_3p	104.562	0.312724	0.229076	1.36516	0.172204	0.755773	Up
Hsa-Mir-181-P2a_5p	282.69	0.351363	0.258537	1.35905	0.174132	0.755773	Up
Hsa-Mir-192-P2_5p	1931.35	-0.408687	0.305343	-1.33845	0.180749	0.755773	Down
Hsa-Mir-181-P1c_5p	28.7174	0.538486	0.403292	1.33523	0.181802	0.755773	Up
Hsa-Mir-185_5p	9684.73	-0.309671	0.23829	-1.29956	0.193753	0.755773	Down
Hsa-Let-7-P1c_5p	1290.22	0.333219	0.257103	1.29605	0.194958	0.755773	Up
Hsa-Mir-1307_5p	114.943	-0.413432	0.319055	-1.2958	0.195044	0.755773	Down
Hsa-Let-7-P1b_5p	1600.92	0.51852	0.402868	1.28707	0.198069	0.755773	Up
Hsa-Mir-17-P1a_3p*	39.1218	-0.3297	0.256799	-1.28388	0.199184	0.755773	Down
Hsa-Mir-185_3p*	247.155	0.240633	0.189185	1.27194	0.203393	0.755773	Up
Hsa-Mir-7-P2_3p*	9.78207	-0.513134	0.404457	-1.2687	0.204549	0.755773	Down
Hsa-Mir-19-P2c_3p	633.927	-0.403202	0.318672	-1.26526	0.205779	0.755773	Down
Hsa-Mir-205-P4_5p	102.014	-0.494023	0.391175	-1.26292	0.206617	0.755773	Down
Hsa-Mir-154-P7_5p	230.206	0.544301	0.432498	1.2585	0.208209	0.755773	Up
Hsa-Mir-19-P2a_3p	632.641	-0.401099	0.319179	-1.25666	0.208878	0.755773	Down
Hsa-Mir-146-P1_3p*	36.0391	0.2884	0.229838	1.2548	0.209552	0.755773	Up
Hsa-Mir-1306_3p*	95.3497	0.567128	0.4531	1.25166	0.210693	0.755773	Up
Hsa-Mir-155_5p	1370.16	0.239703	0.193988	1.23566	0.216587	0.755773	Up
Hsa-Mir-148-P4_5p*	36.9784	-0.389987	0.318892	-1.22294	0.221351	0.755773	Down
Hsa-Mir-143_5p*	17.6756	0.566663	0.465013	1.2186	0.222998	0.755773	Up
Hsa-Mir-154-P5_3p	25.5603	0.639342	0.52696	1.21327	0.225028	0.755773	Up
Hsa-Mir-221-P2a_5p	81.5773	0.42865	0.353724	1.21182	0.22558	0.755773	Up
Hsa-Mir-7-P1_5p	269.525	-0.284503	0.235689	-1.20711	0.227389	0.755773	Down
Hsa-Mir-101-P1-v1_3p	4056.56	-0.40453	0.337484	-1.19867	0.230658	0.755773	Down
Hsa-Mir-7-P4_5p	268.865	-0.283853	0.237123	-1.19707	0.231279	0.755773	Down
Hsa-Mir-10-P2b_5p	1040.19	0.388196	0.326749	1.18806	0.234811	0.755773	Up
Hsa-Mir-101-P2-v1_3p	4161.17	-0.399151	0.337272	-1.18347	0.236623	0.755773	Down
Hsa-Mir-7-P2_5p	277.647	-0.265745	0.224941	-1.1814	0.237444	0.755773	Down
Hsa-Mir-744_5p	2866.29	0.33378	0.283249	1.1784	0.238638	0.755773	Up
Hsa-Mir-130-P4a_3p	180.514	-0.223038	0.189437	-1.17737	0.239047	0.755773	Down
Hsa-Mir-493_3p*	59.8176	0.545001	0.466205	1.16902	0.242397	0.758704	Up
Hsa-Mir-877_5p	17.1266	-0.440505	0.380579	-1.15746	0.247085	0.76572	Down
Hsa-Mir-15-P2b_3p*	119.776	-0.414897	0.367625	-1.12859	0.259072	0.787937	Down
Hsa-Mir-126-P2-v1_5p*	5769.58	-0.25968	0.231555	-1.12146	0.262091	0.787937	Down
Hsa-Let-7-P2c3_5p	8057.32	-0.219055	0.196452	-1.11506	0.264826	0.787937	Down
Hsa-Mir-154-P3a-v1_3p	61.0054	0.551891	0.495187	1.11451	0.26506	0.787937	Up
Hsa-Mir-132-P1_5p*	4.56391	0.520054	0.475848	1.0929	0.274438	0.787937	Up
Hsa-Let-7-P2b2_3p*	37.6852	0.316027	0.289635	1.09112	0.27522	0.787937	Up
Hsa-Mir-30-P1d_3p*	296.951	0.295978	0.271608	1.08972	0.275835	0.787937	Up
Hsa-Mir-338-P2_3p	50.2663	-0.528937	0.489606	-1.08033	0.279994	0.787937	Down
Hsa-Mir-26-P1_5p	10870.2	-0.270081	0.250763	-1.07704	0.281465	0.787937	Down
Hsa-Mir-361-v1_3p*	824.052	0.157183	0.146109	1.07579	0.28202	0.787937	Up
Hsa-Mir-10-P3b_3p*	9.4328	0.443256	0.417161	1.06255	0.287984	0.787937	Up
Hsa-Mir-431_5p	479.01	0.482608	0.457802	1.05419	0.291798	0.787937	Up
Hsa-Mir-26-P4_5p	11089	-0.265639	0.252127	-1.05359	0.292069	0.787937	Down
Hsa-Mir-17-P4d_3p*	295.867	-0.235467	0.225738	-1.0431	0.296901	0.787937	Down
Hsa-Mir-17-P4c_5p	1042.18	-0.323027	0.314456	-1.02726	0.304299	0.787937	Down
Hsa-Mir-193-P1b_5p	289.18	0.41303	0.407437	1.01373	0.310713	0.787937	Up
Hsa-Mir-550-P1_3p	23.5316	-0.40274	0.398381	-1.01094	0.312043	0.787937	Down
Hsa-Mir-550-P2a_3p	23.5316	-0.40274	0.398381	-1.01094	0.312043	0.787937	Down
Hsa-Mir-550-P2b_3p	23.5316	-0.40274	0.398381	-1.01094	0.312043	0.787937	Down
Hsa-Mir-140-P1-v1_5p*	269.976	-0.160626	0.16018	-1.00278	0.315965	0.787937	Down
Hsa-Mir-362-P2-v1_3p	117.398	-0.27335	0.276636	-0.988122	0.323093	0.787937	Down
Hsa-Mir-144-v1_5p*	559.99	-0.431928	0.437581	-0.987081	0.323603	0.787937	Down
Hsa-Mir-139_3p*	358.539	0.379984	0.38819	0.97886	0.327649	0.787937	Up
Hsa-Mir-671_5p	192.66	0.325575	0.333143	0.977284	0.328428	0.787937	Up
Hsa-Mir-145_5p	111.867	-0.444065	0.458689	-0.968119	0.332985	0.787937	Down
Hsa-Mir-17-P4d_5p	31978.3	-0.201825	0.209049	-0.965445	0.334322	0.787937	Down
Hsa-Mir-22-P1b_5p*	31.6436	-0.373305	0.38787	-0.96245	0.335824	0.787937	Down
Hsa-Mir-584_5p	3731.16	0.246289	0.256668	0.959564	0.337275	0.787937	Up
Hsa-Mir-874_3p	47.878	-0.266028	0.277477	-0.958737	0.337691	0.787937	Down
Hsa-Mir-17-P1d_5p	123.5	-0.306361	0.322013	-0.951392	0.341405	0.787937	Down
Hsa-Mir-652_3p	325.69	0.152223	0.16116	0.944547	0.34489	0.787937	Up
Hsa-Mir-23-P2_3p	1023.44	-0.232253	0.24651	-0.942165	0.346108	0.787937	Down
Hsa-Mir-19-P1a_3p	267.112	-0.310663	0.330578	-0.939758	0.347342	0.787937	Down
Hsa-Mir-103-P1_3p	1764.51	-0.247873	0.264224	-0.938117	0.348184	0.787937	Down
Hsa-Let-7-P2a2_3p*	6.52377	-0.408391	0.436367	-0.935887	0.349331	0.787937	Down
Hsa-Mir-590_3p	33.1029	-0.380259	0.406622	-0.935165	0.349703	0.787937	Down
Hsa-Mir-29-P1d-v1_3p	155.974	-0.288136	0.308131	-0.935109	0.349732	0.787937	Down
Hsa-Mir-29-P1b-v1_3p	155.851	-0.287346	0.308384	-0.931781	0.35145	0.787937	Down
Hsa-Mir-1287_5p	53.3762	-0.205874	0.221398	-0.929883	0.352432	0.787937	Down
Hsa-Mir-28-P1_5p	38.1582	0.357438	0.388309	0.920499	0.357312	0.790562	Up
Hsa-Mir-210_3p	77.7506	-0.238066	0.262136	-0.908176	0.363785	0.790562	Down
Hsa-Mir-374-P1_5p	305.002	-0.240374	0.268636	-0.894793	0.370898	0.790562	Down
Hsa-Mir-188-P2_5p	655.613	-0.260933	0.293746	-0.888294	0.374383	0.790562	Down
Hsa-Mir-196-P1_5p	342.89	0.221988	0.250358	0.886685	0.375249	0.790562	Up
Hsa-Mir-331_3p	49.2966	-0.280455	0.317322	-0.883818	0.376794	0.790562	Down
Hsa-Mir-154-P6_3p	13.0568	-0.482464	0.546093	-0.883484	0.376975	0.790562	Down
Hsa-Mir-15-P1a_5p	1456.45	-0.292423	0.332443	-0.879618	0.379066	0.790562	Down
Hsa-Mir-17-P2c_3p*	13.6653	0.466575	0.537049	0.868775	0.38497	0.790562	Up
Hsa-Mir-92-P2d_3p	29305.4	-0.25878	0.299908	-0.862865	0.388212	0.790562	Down
Hsa-Let-7-P2a1_5p	32374.1	0.194369	0.226466	0.85827	0.390744	0.790562	Up
Hsa-Let-7-P2a2_5p	32407.4	0.194212	0.226467	0.857571	0.391129	0.790562	Up
Hsa-Mir-766_3p	44.0825	0.325854	0.382212	0.852548	0.39391	0.790562	Up
Hsa-Let-7-P1d_5p	32360	0.19303	0.226458	0.852389	0.393998	0.790562	Up
Hsa-Let-7-P2b2_5p	130853	0.291283	0.342543	0.850355	0.395128	0.790562	Up
Hsa-Mir-766_5p*	12.0269	-0.444133	0.523602	-0.848226	0.396312	0.790562	Down
Hsa-Mir-23-P2_5p*	14.8345	0.32748	0.386267	0.84781	0.396544	0.790562	Up
Hsa-Mir-2355_3p	26.184	-0.434397	0.517803	-0.838924	0.401512	0.792332	Down
Hsa-Mir-140-P1-v1_3p	5506.33	-0.157559	0.188831	-0.83439	0.404061	0.792332	Down
Hsa-Mir-193-P2a_3p	12.3696	-0.360609	0.437891	-0.823512	0.410217	0.792332	Down
Hsa-Mir-193-P2b_3p	12.3696	-0.360609	0.437891	-0.823512	0.410217	0.792332	Down
Hsa-Mir-154-P23_3p	303.679	0.384421	0.470341	0.817324	0.413743	0.792332	Up
Hsa-Mir-203-v1_3p	50.1592	-0.383782	0.470822	-0.815133	0.414996	0.792332	Down
Hsa-Mir-33-P3_5p	10.6475	-0.31172	0.382543	-0.814862	0.415151	0.792332	Down
Hsa-Mir-1301_3p	329.076	0.274302	0.339066	0.808993	0.418519	0.793918	Up
Hsa-Mir-1-P2_3p	46.2806	-0.386315	0.482876	-0.800029	0.423694	0.79656	Down
Hsa-Mir-197_3p	595.276	0.237002	0.297553	0.796505	0.425738	0.79656	Up
Hsa-Mir-144-v1_3p	620.351	-0.321533	0.407011	-0.789985	0.429536	0.79656	Down
Hsa-Mir-30-P1a_5p	33076.7	0.111062	0.14097	0.787842	0.430789	0.79656	Up
Hsa-Mir-628_3p	235.886	0.187356	0.239758	0.781438	0.434545	0.79656	Up
Hsa-Mir-651_5p	11.2717	-0.285755	0.367676	-0.777192	0.437045	0.79656	Down
Hsa-Mir-339_3p	231.202	0.113883	0.146749	0.776038	0.437726	0.79656	Up
Hsa-Mir-21_3p*	21.6803	-0.265299	0.348873	-0.760447	0.446988	0.808712	Down
Hsa-Mir-483_3p*	128.281	-0.496308	0.67337	-0.737051	0.461091	0.817171	Down
Hsa-Mir-324_3p*	260.18	-0.12238	0.166381	-0.73554	0.462011	0.817171	Down
Hsa-Mir-130-P3b_5p*	49.1927	-0.154819	0.211085	-0.733446	0.463287	0.817171	Down
Hsa-Mir-199-P1-v1_5p*	101.563	-0.276171	0.379603	-0.727526	0.466904	0.817171	Down
Hsa-Mir-199-P3-v1_5p*	101.563	-0.276171	0.379603	-0.727526	0.466904	0.817171	Down
Hsa-Mir-760_3p	76.7887	0.263132	0.366793	0.717384	0.473137	0.817171	Up
Hsa-Mir-26-P1_3p*	18.0093	-0.297182	0.416577	-0.713389	0.475605	0.817171	Down
Hsa-Mir-30-P1d_5p	11028.5	-0.13271	0.186248	-0.712543	0.476129	0.817171	Down
Hsa-Mir-224_5p	1728.39	-0.293458	0.412869	-0.710779	0.477221	0.817171	Down
Hsa-Mir-29-P2d_5p*	79.929	-0.177492	0.251346	-0.706168	0.480084	0.817171	Down
Hsa-Mir-505-v1_5p	93.5822	0.16216	0.22979	0.705689	0.480382	0.817171	Up
Hsa-Mir-22-P1b_3p	3633.79	-0.149688	0.21582	-0.693579	0.487946	0.825552	Down
Hsa-Mir-29-P2b_3p	844.648	0.145767	0.211617	0.688828	0.490931	0.826137	Up
Hsa-Mir-188-P2_3p*	225.326	-0.214561	0.317358	-0.676086	0.498986	0.835201	Down
Hsa-Mir-27-P2_3p	1476.82	-0.175672	0.265114	-0.662629	0.507568	0.845047	Down
Hsa-Mir-337-v1_5p	27.2881	-0.308946	0.471716	-0.654941	0.512506	0.845632	Down
Hsa-Mir-197_5p*	7.90159	0.307817	0.473	0.650776	0.515191	0.845632	Up
Hsa-Mir-423_5p	41415.6	0.23205	0.357283	0.649485	0.516025	0.845632	Up
Hsa-Mir-92-P1d_5p*	89.4296	-0.274514	0.429527	-0.639107	0.522753	0.849627	Down
Hsa-Mir-3173_5p	40.918	0.197427	0.310814	0.635193	0.525303	0.849627	Up
Hsa-Mir-154-P13-v1_5p	58.1142	0.286451	0.452389	0.633195	0.526606	0.849627	Up
Hsa-Mir-885_3p*	23.1171	0.37399	0.594913	0.628646	0.529581	0.850001	Up
Hsa-Mir-154-P15_5p	140.921	0.309059	0.501919	0.615755	0.538056	0.850001	Up
Hsa-Mir-15-P2a_5p	300662	-0.18517	0.300898	-0.61539	0.538297	0.850001	Down
Hsa-Mir-15-P2b_5p	300611	-0.185169	0.301019	-0.615141	0.538461	0.850001	Down
Hsa-Mir-598_3p	73.174	-0.161229	0.264632	-0.609257	0.542354	0.850001	Down
Hsa-Mir-1343_3p	12.0203	-0.238094	0.391549	-0.608084	0.543132	0.850001	Down
Hsa-Mir-17-P1d_3p	2368.31	-0.179125	0.298777	-0.599526	0.548822	0.854021	Down
Hsa-Mir-342_5p*	25.2683	0.202856	0.340347	0.596027	0.551157	0.854021	Up
Hsa-Mir-190-P1_5p	153.102	0.181004	0.306678	0.590208	0.555051	0.855817	Up
Hsa-Mir-190-P3_5p	78.9259	0.13606	0.232368	0.585535	0.558188	0.856435	Up
Hsa-Mir-191_3p*	73.1117	0.187809	0.326715	0.574841	0.565399	0.858583	Up
Hsa-Mir-28-P2_3p	10320.6	0.137494	0.240633	0.571386	0.567738	0.858583	Up
Hsa-Mir-17-P1a_5p	1070.66	-0.114824	0.201616	-0.569518	0.569005	0.858583	Down
Hsa-Mir-320-P3_3p	169.94	0.198719	0.353726	0.561786	0.574262	0.858583	Up
Hsa-Mir-34-P1_5p	76.4928	-0.212241	0.377923	-0.5616	0.574389	0.858583	Down
Hsa-Mir-154-P36_3p	1733.22	0.252027	0.452899	0.556474	0.577887	0.858583	Up
Hsa-Mir-154-P10_5p	1891.03	0.234739	0.426723	0.550097	0.582253	0.858583	Up
Hsa-Mir-223_5p*	744.893	0.146694	0.266801	0.549824	0.58244	0.858583	Up
Hsa-Mir-425_3p*	496.281	0.122301	0.223523	0.54715	0.584276	0.858583	Up
Hsa-Mir-154-P15_3p*	386.616	0.231356	0.434962	0.5319	0.594795	0.869958	Up
Hsa-Mir-362-P4_3p	102.15	-0.154418	0.296257	-0.521231	0.602206	0.873359	Down
Hsa-Mir-28-P2_5p	347.335	-0.128565	0.247111	-0.520271	0.602874	0.873359	Down
Hsa-Mir-30-P1b_3p*	43.1386	-0.169133	0.327447	-0.516519	0.605492	0.873359	Down
Hsa-Let-7-P2c2_3p*	18.4035	-0.234968	0.459693	-0.511141	0.609252	0.874752	Down
Hsa-Mir-505-v1_3p*	38.5669	0.146129	0.290827	0.502461	0.615344	0.879464	Up
Hsa-Mir-483_5p	671.182	0.283065	0.569322	0.497197	0.61905	0.88074	Up
Hsa-Mir-96-P2_5p	3227.49	-0.248289	0.505312	-0.491358	0.623173	0.882594	Down
Hsa-Mir-148-P4_3p	1849.51	-0.0870432	0.179786	-0.48415	0.628279	0.883796	Down
Hsa-Mir-576_5p	578.629	-0.161358	0.334635	-0.482192	0.62967	0.883796	Down
Hsa-Mir-335_5p	437.632	-0.136984	0.287535	-0.476407	0.633785	0.885601	Down
Hsa-Mir-15-P1b_5p	2255.14	-0.130164	0.28222	-0.461215	0.644644	0.896772	Down
Hsa-Mir-181-P1a_3p*	74.4259	-0.125062	0.276012	-0.453102	0.650475	0.900879	Down
Hsa-Mir-320-P4_3p	203.024	0.146229	0.326736	0.447546	0.654481	0.902434	Up
Hsa-Mir-146-P4_5p	20558.9	0.15634	0.358452	0.436153	0.662726	0.907726	Up
Hsa-Mir-26-P2_3p*	44.4062	0.105489	0.24599	0.428832	0.668045	0.907726	Up
Hsa-Mir-28-P1_3p	1225.25	0.127282	0.300239	0.423934	0.671614	0.907726	Up
Hsa-Mir-96-P3-v1_5p	1622.86	-0.198892	0.470538	-0.422691	0.672521	0.907726	Down
Hsa-Mir-10-P1c-v1_5p	739.331	-0.080227	0.193331	-0.414972	0.678163	0.907726	Down
Hsa-Mir-320-P2a_3p	285.407	0.124818	0.303069	0.411847	0.680452	0.907726	Up
Hsa-Mir-204-P2_5p	18.6954	-0.165913	0.403335	-0.411354	0.680813	0.907726	Down
Hsa-Mir-188-P3_5p	1665.54	-0.134265	0.328161	-0.409144	0.682434	0.907726	Down
Hsa-Mir-154-P9_3p	160.557	0.173025	0.425709	0.406439	0.68442	0.907726	Up
Hsa-Mir-493_5p	55.2043	0.195918	0.488967	0.400677	0.688658	0.909493	Up
Hsa-Mir-451_5p	65873.9	-0.140407	0.35533	-0.395145	0.692736	0.911035	Down
Hsa-Let-7-P2b3_5p	822.682	0.094642	0.24452	0.387053	0.698717	0.912346	Up
Hsa-Mir-425_5p	17835	0.0846808	0.219915	0.385061	0.700193	0.912346	Up
Hsa-Mir-1306_5p	249.529	0.115333	0.304537	0.378716	0.704898	0.912346	Up
Hsa-Mir-324_5p	589.099	-0.123842	0.329629	-0.375703	0.707138	0.912346	Down
Hsa-Mir-154-P3b_3p	115.652	0.164739	0.440326	0.374131	0.708307	0.912346	Up
Hsa-Mir-320-P2b_3p	288.754	0.111069	0.301781	0.368046	0.712839	0.914421	Up
Hsa-Mir-134_5p	771.593	0.155041	0.449905	0.344609	0.730389	0.930348	Up
Hsa-Mir-92-P1a_3p	78428	0.111934	0.325833	0.34353	0.7312	0.930348	Up
Hsa-Mir-126-P2-v1_3p	46553.5	-0.0883439	0.262219	-0.336909	0.736185	0.931509	Down
Hsa-Mir-629_5p	896.668	0.0902608	0.269905	0.334417	0.738065	0.931509	Up
Hsa-Mir-148-P3_3p	322.732	0.099366	0.311059	0.319444	0.74939	0.940522	Up
Hsa-Mir-154-P17_3p	49.731	0.155467	0.490374	0.317037	0.751216	0.940522	Up
Hsa-Mir-3613_5p	176.152	0.146711	0.503371	0.291458	0.770701	0.948123	Up
Hsa-Mir-1-P3_3p	47.6207	-0.141434	0.48659	-0.290663	0.771309	0.948123	Down
Hsa-Mir-340_5p	250.43	0.0831026	0.290793	0.285779	0.775047	0.948123	Up
Hsa-Mir-335_3p	104.995	0.0963523	0.349473	0.275708	0.782773	0.948123	Up
Hsa-Mir-3200_3p	36.7551	-0.132296	0.488059	-0.271066	0.78634	0.948123	Down
Hsa-Mir-1249_3p	8.95109	0.173805	0.641271	0.271032	0.786366	0.948123	Up
Hsa-Mir-10-P2d_5p	100.96	0.116401	0.431198	0.269948	0.7872	0.948123	Up
Hsa-Mir-148-P1_3p	4918.69	0.0587823	0.223869	0.262575	0.792878	0.948123	Up
Hsa-Mir-92-P1c_3p	75771.4	0.0853361	0.335076	0.254677	0.798973	0.948123	Up
Hsa-Mir-1296_5p	34.6544	0.068848	0.271201	0.253864	0.799601	0.948123	Up
Hsa-Mir-154-P18_3p	55.4454	0.116197	0.482618	0.240764	0.809738	0.948123	Up
Hsa-Mir-181-P1c_3p*	22.2496	-0.0988562	0.418935	-0.23597	0.813456	0.948123	Down
Hsa-Mir-342_3p	5844.48	0.0495128	0.210287	0.235453	0.813857	0.948123	Up
Hsa-Mir-1270_5p	37.923	0.0836766	0.361023	0.231777	0.816712	0.948123	Up
Hsa-Mir-362-P2-v1_5p*	4.70406	0.127325	0.566667	0.22469	0.82222	0.948123	Up
Hsa-Mir-362-P5_5p	4.70406	0.127325	0.566667	0.22469	0.82222	0.948123	Up
Hsa-Mir-769_5p	108.752	0.0586493	0.278225	0.210798	0.833045	0.948123	Up
Hsa-Mir-142-P1-v1_3p*	13076.6	0.0699348	0.332913	0.210069	0.833614	0.948123	Up
Hsa-Mir-486_3p*	651.96	-0.0760238	0.361963	-0.210032	0.833643	0.948123	Down
Hsa-Mir-10-P1b-v1_5p	568.721	-0.0660348	0.320023	-0.206344	0.836522	0.948123	Down
Hsa-Mir-10-P3b_5p	4402.48	-0.0600677	0.291272	-0.206225	0.836615	0.948123	Down
Hsa-Mir-1180_3p	599.458	-0.087186	0.42717	-0.204101	0.838274	0.948123	Down
Hsa-Mir-92-P2d_5p*	123.595	-0.0628428	0.310944	-0.202104	0.839836	0.948123	Down
Hsa-Mir-199-P1-v1_3p	3329.47	-0.0626236	0.314257	-0.199275	0.842047	0.948123	Down
Hsa-Mir-17-P1c_5p	19.0355	0.0901082	0.454785	0.198134	0.84294	0.948123	Up
Hsa-Mir-199-P2-v1_3p	3317.13	-0.0621386	0.313895	-0.19796	0.843076	0.948123	Down
Hsa-Mir-199-P3-v1_3p	3317.13	-0.0621386	0.313895	-0.19796	0.843076	0.948123	Down
Hsa-Mir-486_5p	401237	-0.0759034	0.397573	-0.190917	0.848591	0.948123	Down
Hsa-Mir-1-P1_3p	52.7099	-0.092382	0.484151	-0.190812	0.848673	0.948123	Down
Hsa-Mir-3187_3p	43.4389	-0.0611335	0.331411	-0.184464	0.853649	0.948123	Down
Hsa-Mir-29-P2d_3p	983.703	-0.0412775	0.224143	-0.184157	0.853891	0.948123	Down
Hsa-Mir-17-P2a_3p*	149.372	-0.0660361	0.361424	-0.182711	0.855025	0.948123	Down
Hsa-Mir-92-P1d_3p	764.725	0.0693886	0.398361	0.174185	0.86172	0.948123	Up
Hsa-Mir-103-P4_3p	10314.5	-0.0289139	0.173366	-0.16678	0.867544	0.948123	Down
Hsa-Mir-362-P3_3p	384.042	0.0583796	0.356375	0.163815	0.869877	0.948123	Up
Hsa-Mir-103-P2_3p	10334.1	-0.028114	0.173593	-0.161953	0.871343	0.948123	Down
Hsa-Mir-32_5p	200.934	-0.0478635	0.295719	-0.161855	0.87142	0.948123	Down
Hsa-Mir-15-P2c_5p	80.0397	0.0501686	0.314525	0.159506	0.873271	0.948123	Up
Hsa-Mir-374-P2_5p	140.612	-0.045152	0.288008	-0.156774	0.875423	0.948123	Down
Hsa-Mir-191_5p	20832.6	0.0295791	0.203244	0.145535	0.884289	0.952251	Up
Hsa-Mir-154-P5_5p	92.7276	0.0644851	0.447103	0.144229	0.88532	0.952251	Up
Hsa-Mir-296_5p	55.6261	-0.0495936	0.36116	-0.137318	0.89078	0.953678	Down
Hsa-Mir-8-P1b_3p	142.218	0.033724	0.250109	0.134837	0.89274	0.953678	Up
Hsa-Mir-221-P2a_3p	11799.7	0.037896	0.301265	0.12579	0.899898	0.953764	Up
Hsa-Mir-154-P36_5p*	26.0741	-0.057307	0.45934	-0.12476	0.900714	0.953764	Down
Hsa-Mir-378_3p	865.16	0.0270902	0.219917	0.123184	0.901962	0.953764	Up
Hsa-Mir-143_3p	1336.22	-0.037948	0.347517	-0.109198	0.913046	0.961472	Down
Hsa-Let-7-P2c1_3p*	1107.64	0.0152228	0.143292	0.106236	0.915395	0.961472	Up
Hsa-Mir-1277_5p	60.9713	-0.0492514	0.512536	-0.0960936	0.923446	0.963929	Down
Hsa-Mir-320-P1_3p	15980.8	-0.0208645	0.218408	-0.09553	0.923894	0.963929	Down
Hsa-Mir-628_5p	55.6827	0.0290715	0.336075	0.0865031	0.931066	0.968185	Up
Hsa-Mir-885_5p	16.7513	-0.04271	0.625892	-0.0682386	0.945596	0.978099	Down
Hsa-Mir-326_3p	406.634	-0.0202004	0.337522	-0.0598492	0.952276	0.978099	Down
Hsa-Mir-146-P1_5p	974.892	0.0162178	0.294778	0.0550171	0.956125	0.978099	Up
Hsa-Mir-1294_5p	163.193	0.021404	0.403739	0.0530145	0.95772	0.978099	Up
Hsa-Mir-150_5p	5785.86	-0.0171916	0.331092	-0.0519238	0.958589	0.978099	Down
Hsa-Mir-150_3p*	31.203	0.0196571	0.385659	0.0509703	0.959349	0.978099	Up
Hsa-Mir-378_5p*	29.2411	-0.0121877	0.318482	-0.0382681	0.969474	0.985212	Down
Hsa-Mir-3200_5p*	26.9	-0.0127657	0.540049	-0.0236381	0.981141	0.99054	Down
Hsa-Mir-96-P1_5p	434.894	-0.00762064	0.430159	-0.0177158	0.985866	0.99054	Down
Hsa-Mir-10-P2b_3p*	33.4472	0.00719768	0.476004	0.015121	0.987936	0.99054	Up
Hsa-Mir-92-P2c_3p	1824.02	-0.00494115	0.333226	-0.0148282	0.988169	0.99054	Down
Hsa-Mir-589_5p	76.632	-0.00218226	0.18406	-0.0118563	0.99054	0.99054	Down

## Sheet: B_HB_Vs_Be
	baseMean	log2FoldChange	lfcSE	stat	pvalue	padj	Regulation
Hsa-Mir-192-P1_5p	32.0364	-1.48813	0.402113	-3.70077	0.000214947	0.0408453	Down
Hsa-Mir-8-P2b_3p	52.7453	-1.26393	0.346166	-3.65122	0.000260993	0.0408453	Down
Hsa-Mir-214-v1_3p	12.5856	-1.40413	0.435265	-3.22593	0.00125565	0.131006	Down
Hsa-Mir-34-P1_5p	76.4928	-0.872689	0.342361	-2.54903	0.0108024	0.683491	Down
Hsa-Mir-361-v1_3p*	824.052	0.335868	0.131956	2.5453	0.0109184	0.683491	Up
Hsa-Mir-8-P2a_3p	29.6928	-0.744845	0.303373	-2.45521	0.0140802	0.734517	Down
Hsa-Mir-885_5p	16.7513	-1.35083	0.571857	-2.36217	0.0181681	0.812375	Down
Hsa-Mir-3613_5p	176.152	1.02877	0.45479	2.26209	0.0236921	0.926954	Up
Hsa-Mir-10-P3d_5p	519.921	-0.610803	0.295244	-2.0688	0.0385644	0.989406	Down
Hsa-Mir-10-P3c_5p	518.004	-0.611273	0.29583	-2.0663	0.0388003	0.989406	Down
Hsa-Mir-15-P2c_5p	80.0397	0.55262	0.281754	1.96136	0.0498375	0.989406	Up
Hsa-Mir-30-P1a_5p	33076.7	0.24787	0.127754	1.94022	0.0523534	0.989406	Up
Hsa-Mir-375_3p	380.894	-0.696514	0.388739	-1.79173	0.073177	0.989406	Down
Hsa-Mir-30-P1b_5p	787.988	-0.418431	0.237629	-1.76086	0.0782627	0.989406	Down
Hsa-Mir-17-P2a_5p	302.414	-0.323604	0.187983	-1.72145	0.0851691	0.989406	Down
Hsa-Mir-483_3p*	128.281	-1.02581	0.610079	-1.68144	0.0926768	0.989406	Down
Hsa-Mir-127_3p	599.088	0.701085	0.420524	1.66717	0.0954808	0.989406	Up
Hsa-Mir-204-P2_5p	18.6954	-0.590356	0.362771	-1.62735	0.103662	0.989406	Down
Hsa-Mir-23-P2_3p	1023.44	-0.359075	0.223242	-1.60846	0.107734	0.989406	Down
Hsa-Mir-95-P1_3p	21.8321	-0.463372	0.28926	-1.60192	0.109173	0.989406	Down
Hsa-Mir-339_3p	231.202	0.209353	0.131513	1.59188	0.111413	0.989406	Up
Hsa-Mir-140-P1-v1_5p*	269.976	-0.228199	0.144075	-1.58389	0.113218	0.989406	Down
Hsa-Mir-28-P2_5p	347.335	-0.352331	0.223551	-1.57606	0.115012	0.989406	Down
Hsa-Mir-1307_3p*	2726.33	0.455637	0.289294	1.575	0.115257	0.989406	Up
Hsa-Mir-181-P1b_3p*	167.552	0.294254	0.18965	1.55156	0.120768	0.989406	Up
Hsa-Mir-362-P1_5p	25.2636	0.421827	0.277073	1.52244	0.127899	0.989406	Up
Hsa-Mir-491_5p	74.0377	0.375243	0.252256	1.48755	0.13687	0.989406	Up
Hsa-Mir-27-P2_3p	1476.82	-0.357041	0.240181	-1.48655	0.137135	0.989406	Down
Hsa-Mir-23-P3_3p	5605.28	-0.392948	0.265993	-1.47729	0.139599	0.989406	Down
Hsa-Mir-27-P3_3p	690.349	-0.450861	0.313194	-1.43956	0.149992	0.989406	Down
Hsa-Mir-1908_5p	192.674	0.442063	0.316318	1.39753	0.162255	0.989406	Up
Hsa-Mir-423_5p	41415.6	0.449375	0.323812	1.38777	0.165208	0.989406	Up
Hsa-Mir-10-P1b-v1_5p	568.721	-0.399514	0.289909	-1.37806	0.168184	0.989406	Down
Hsa-Let-7-P2c2_3p*	18.4035	0.54957	0.401268	1.36958	0.170818	0.989406	Up
Hsa-Mir-139_5p	83.8792	-0.384738	0.282239	-1.36316	0.172832	0.989406	Down
Hsa-Mir-181-P2c_5p	84.2933	0.493447	0.368357	1.33959	0.180379	0.989406	Up
Hsa-Mir-26-P2_5p	18293.7	-0.237548	0.179652	-1.32227	0.186079	0.989406	Down
Hsa-Mir-185_3p*	247.155	0.221083	0.170619	1.29576	0.195057	0.989406	Up
Hsa-Mir-146-P1_3p*	36.0391	0.261511	0.204175	1.28082	0.200258	0.989406	Up
Hsa-Mir-15-P2a_5p	300662	0.348825	0.272711	1.2791	0.200861	0.989406	Up
Hsa-Mir-15-P2b_5p	300611	0.348915	0.27282	1.27892	0.200926	0.989406	Up
Hsa-Mir-3138_3p	45.3814	0.370916	0.291293	1.27335	0.202895	0.989406	Up
Hsa-Mir-205-P4_5p	102.014	-0.436172	0.352903	-1.23596	0.216475	0.989406	Down
Hsa-Mir-126-P2-v1_3p	46553.5	-0.293138	0.237653	-1.23347	0.2174	0.989406	Down
Hsa-Mir-1249_3p	8.95109	-0.717702	0.583993	-1.22896	0.219088	0.989406	Down
Hsa-Mir-15-P2d_5p	21.7288	-0.476262	0.387854	-1.22794	0.219468	0.989406	Down
Hsa-Mir-23-P2_5p*	14.8345	0.413477	0.342677	1.20661	0.227583	0.989406	Up
Hsa-Mir-130-P3b_3p	872.151	-0.247724	0.207514	-1.19377	0.232567	0.989406	Down
Hsa-Mir-15-P1a_5p	1456.45	0.355768	0.301049	1.18176	0.237299	0.989406	Up
Hsa-Mir-8-P1b_3p	142.218	-0.265854	0.225978	-1.17646	0.239411	0.989406	Down
Hsa-Mir-486_5p	401237	0.422515	0.36033	1.17258	0.240966	0.989406	Up
Hsa-Mir-15-P1d_5p	9.73856	-0.60106	0.515233	-1.16658	0.24338	0.989406	Down
Hsa-Mir-33-P3_5p	10.6475	-0.388957	0.335948	-1.15779	0.24695	0.989406	Down
Hsa-Mir-24-P3_3p	2413.05	-0.286179	0.250263	-1.14351	0.252826	0.989406	Down
Hsa-Mir-769_5p	108.752	0.284788	0.250224	1.13813	0.255066	0.989406	Up
Hsa-Mir-24-P2_3p	2448.35	-0.286762	0.252246	-1.13684	0.255607	0.989406	Down
Hsa-Mir-130-P2b_3p	111.401	-0.32863	0.28969	-1.13442	0.256618	0.989406	Down
Hsa-Mir-26-P1_5p	10870.2	-0.256847	0.227253	-1.13023	0.258381	0.989406	Down
Hsa-Mir-17-P2c_3p*	13.6653	0.541605	0.480482	1.12721	0.259653	0.989406	Up
Hsa-Mir-26-P4_5p	11089	-0.255704	0.228489	-1.11911	0.263094	0.989406	Down
Hsa-Mir-493_3p*	59.8176	0.467812	0.421586	1.10965	0.267151	0.989406	Up
Hsa-Mir-29-P2d_3p	983.703	0.224839	0.202835	1.10848	0.267654	0.989406	Up
Hsa-Mir-1306_3p*	95.3497	0.453234	0.410113	1.10514	0.269097	0.989406	Up
Hsa-Mir-574_3p	221.922	-0.283337	0.256545	-1.10443	0.269405	0.989406	Down
Hsa-Mir-197_5p*	7.90159	0.458993	0.416059	1.10319	0.269944	0.989406	Up
Hsa-Mir-425_3p*	496.281	0.221984	0.202135	1.0982	0.272119	0.989406	Up
Hsa-Mir-339_5p	1342.16	0.194598	0.179327	1.08516	0.277851	0.989406	Up
Hsa-Mir-370_3p	307.924	0.436381	0.40335	1.08189	0.2793	0.989406	Up
Hsa-Mir-126-P2-v1_5p*	5769.58	-0.226069	0.209821	-1.07743	0.281287	0.989406	Down
Hsa-Mir-320-P1_3p	15980.8	0.213216	0.197929	1.07724	0.281375	0.989406	Up
Hsa-Mir-139_3p*	358.539	0.373654	0.351573	1.06281	0.28787	0.989406	Up
Hsa-Mir-362-P2-v1_5p*	4.70406	0.508987	0.485939	1.04743	0.294901	0.989406	Up
Hsa-Mir-362-P5_5p	4.70406	0.508987	0.485939	1.04743	0.294901	0.989406	Up
Hsa-Mir-28-P1_5p	38.1582	-0.368125	0.352454	-1.04446	0.296271	0.989406	Down
Hsa-Mir-589_5p	76.632	0.16896	0.162794	1.03788	0.299327	0.989406	Up
Hsa-Let-7-P2b2_5p	130853	0.321735	0.310455	1.03634	0.300046	0.989406	Up
Hsa-Mir-142-P1-v1_3p*	13076.6	-0.310783	0.301724	-1.03003	0.302998	0.989406	Down
Hsa-Mir-30-P1b_3p*	43.1386	-0.297236	0.293978	-1.01108	0.311977	0.989406	Down
Hsa-Mir-3173_5p	40.918	0.280789	0.277848	1.01058	0.312216	0.989406	Up
Hsa-Let-7-P2c2_5p	42123.1	0.162795	0.161524	1.00787	0.313515	0.989406	Up
Hsa-Mir-224_5p	1728.39	-0.372312	0.374127	-0.995147	0.319665	0.989406	Down
Hsa-Mir-425_5p	17835	0.197464	0.199302	0.990782	0.321792	0.989406	Up
Hsa-Mir-10-P2b_5p	1040.19	0.292036	0.296055	0.986426	0.323924	0.989406	Up
Hsa-Mir-140-P1-v1_3p	5506.33	0.167463	0.171068	0.978932	0.327614	0.989406	Up
Hsa-Mir-29-P2d_5p*	79.929	0.214712	0.223883	0.95904	0.337539	0.989406	Up
Hsa-Mir-432_5p	1659.94	0.419284	0.444116	0.944086	0.345126	0.989406	Up
Hsa-Mir-154-P18_3p	55.4454	0.405429	0.43495	0.932129	0.35127	0.989406	Up
Hsa-Mir-671_5p	192.66	0.276787	0.301404	0.918323	0.35845	0.989406	Up
Hsa-Mir-192-P2_5p	1931.35	-0.25356	0.276617	-0.916645	0.359328	0.989406	Down
Hsa-Mir-26-P1_3p*	18.0093	-0.339311	0.37108	-0.914386	0.360514	0.989406	Down
Hsa-Mir-17-P1a_5p	1070.66	-0.166626	0.182505	-0.912996	0.361245	0.989406	Down
Hsa-Mir-10-P2b_3p*	33.4472	0.387678	0.42704	0.907826	0.36397	0.989406	Up
Hsa-Mir-196-P1_5p	342.89	0.204793	0.226432	0.904437	0.365764	0.989406	Up
Hsa-Mir-132-P1_5p*	4.56391	0.379656	0.420937	0.901932	0.367093	0.989406	Up
Hsa-Mir-92-P2d_5p*	123.595	0.250211	0.279895	0.893945	0.371351	0.989406	Up
Hsa-Mir-328_3p	1843.31	0.214243	0.242008	0.885271	0.376011	0.989406	Up
Hsa-Mir-181-P1c_5p	28.7174	0.319563	0.364	0.877918	0.379988	0.989406	Up
Hsa-Let-7-P2b2_3p*	37.6852	0.227551	0.259573	0.876634	0.380685	0.989406	Up
Hsa-Mir-374-P1_5p	305.002	-0.209743	0.242779	-0.863926	0.387629	0.989406	Down
Hsa-Mir-629_5p	896.668	0.209774	0.24439	0.858358	0.390695	0.989406	Up
Hsa-Mir-154-P23_3p	303.679	0.359417	0.42604	0.843621	0.398881	0.989406	Up
Hsa-Mir-628_5p	55.6827	-0.251861	0.303225	-0.830606	0.406197	0.989406	Down
Hsa-Mir-92-P2d_3p	29305.4	0.222949	0.271804	0.820257	0.41207	0.989406	Up
Hsa-Mir-1180_3p	599.458	0.314378	0.386836	0.812692	0.416395	0.989406	Up
Hsa-Mir-30-P1d_5p	11028.5	0.13679	0.168766	0.810529	0.417636	0.989406	Up
Hsa-Mir-92-P1a_3p	78428	0.236249	0.29531	0.800004	0.423708	0.989406	Up
Hsa-Mir-15-P1b_5p	2255.14	0.203741	0.255652	0.796948	0.425481	0.989406	Up
Hsa-Mir-154-P3a-v1_3p	61.0054	0.355505	0.448154	0.793265	0.427623	0.989406	Up
Hsa-Mir-338-P2_3p	50.2663	-0.348965	0.440706	-0.791833	0.428458	0.989406	Down
Hsa-Mir-19-P2c_3p	633.927	0.225443	0.288213	0.78221	0.434091	0.989406	Up
Hsa-Mir-361-v1_5p	1549.2	-0.119901	0.153829	-0.779442	0.435719	0.989406	Down
Hsa-Mir-19-P2a_3p	632.641	0.224372	0.288674	0.777251	0.437011	0.989406	Up
Hsa-Mir-145_5p	111.867	-0.32196	0.414344	-0.777036	0.437137	0.989406	Down
Hsa-Mir-3187_3p	43.4389	0.228805	0.295676	0.773837	0.439027	0.989406	Up
Hsa-Mir-431_5p	479.01	0.320956	0.414811	0.77374	0.439084	0.989406	Up
Hsa-Mir-22-P1b_3p	3633.79	0.150974	0.195503	0.772237	0.439974	0.989406	Up
Hsa-Let-7-P2b3_5p	822.682	-0.170929	0.221477	-0.771768	0.440252	0.989406	Down
Hsa-Mir-766_3p	44.0825	0.264251	0.344486	0.767086	0.44303	0.989406	Up
Hsa-Mir-92-P1c_3p	75771.4	0.232203	0.303686	0.764615	0.444501	0.989406	Up
Hsa-Mir-223_3p	50728.3	-0.206517	0.273203	-0.755912	0.449702	0.989406	Down
Hsa-Mir-1270_5p	37.923	0.23805	0.323268	0.736385	0.461496	0.989406	Up
Hsa-Mir-10-P3b_5p	4402.48	-0.191724	0.263957	-0.726346	0.467627	0.989406	Down
Hsa-Mir-760_3p	76.7887	0.240331	0.331105	0.725845	0.467934	0.989406	Up
Hsa-Mir-148-P4_5p*	36.9784	-0.204454	0.283223	-0.721884	0.470366	0.989406	Down
Hsa-Mir-29-P1d-v1_3p	155.974	0.198101	0.277258	0.714503	0.474916	0.989406	Up
Hsa-Mir-29-P1b-v1_3p	155.851	0.197237	0.277491	0.710789	0.477215	0.989406	Up
Hsa-Mir-10-P1c-v1_5p	739.331	-0.12399	0.174906	-0.708893	0.478391	0.989406	Down
Hsa-Mir-193-P2a_3p	12.3696	-0.27139	0.385032	-0.70485	0.480904	0.989406	Down
Hsa-Mir-193-P2b_3p	12.3696	-0.27139	0.385032	-0.70485	0.480904	0.989406	Down
Hsa-Mir-598_3p	73.174	0.166125	0.236078	0.703686	0.481628	0.989406	Up
Hsa-Mir-423_3p	5290.44	0.145043	0.207863	0.697782	0.485313	0.989406	Up
Hsa-Mir-493_5p	55.2043	0.297491	0.441381	0.674001	0.500311	0.989406	Up
Hsa-Mir-1296_5p	34.6544	-0.162909	0.242793	-0.670978	0.502234	0.989406	Down
Hsa-Mir-181-P2b_5p	300.634	0.153757	0.229286	0.670591	0.502481	0.989406	Up
Hsa-Mir-143_3p	1336.22	-0.21091	0.314886	-0.669798	0.502986	0.989406	Down
Hsa-Mir-194-P1_5p	263.124	-0.200007	0.300969	-0.664542	0.506343	0.989406	Down
Hsa-Mir-154-P13-v1_5p	58.1142	0.271331	0.408604	0.664043	0.506663	0.989406	Up
Hsa-Mir-15-P1c_5p	41.5377	0.29605	0.450279	0.657482	0.510871	0.989406	Up
Hsa-Mir-103-P1_3p	1764.51	0.156194	0.239267	0.6528	0.513885	0.989406	Up
Hsa-Mir-154-P9_3p	160.557	0.247877	0.385159	0.643569	0.519855	0.989406	Up
Hsa-Mir-194-P2_5p	270.822	-0.193887	0.304039	-0.637705	0.523665	0.989406	Down
Hsa-Mir-199-P2-v1_3p	3317.13	-0.180668	0.284453	-0.635143	0.525335	0.989406	Down
Hsa-Mir-199-P3-v1_3p	3317.13	-0.180668	0.284453	-0.635143	0.525335	0.989406	Down
Hsa-Mir-362-P3_3p	384.042	0.20477	0.322585	0.634779	0.525572	0.989406	Up
Hsa-Mir-199-P1-v1_3p	3329.47	-0.180402	0.284781	-0.633477	0.526422	0.989406	Down
Hsa-Mir-199-P1-v1_5p*	101.563	-0.216792	0.34254	-0.632895	0.526802	0.989406	Down
Hsa-Mir-199-P3-v1_5p*	101.563	-0.216792	0.34254	-0.632895	0.526802	0.989406	Down
Hsa-Mir-885_3p*	23.1171	-0.339284	0.539737	-0.62861	0.529604	0.989406	Down
Hsa-Mir-874_3p	47.878	-0.153229	0.246759	-0.620967	0.534621	0.989406	Down
Hsa-Mir-19-P1a_3p	267.112	0.184792	0.298441	0.619191	0.535791	0.989406	Up
Hsa-Mir-154-P7_5p	230.206	0.241764	0.391849	0.616982	0.537246	0.989406	Up
Hsa-Mir-671_3p	81.2651	0.201999	0.331155	0.609983	0.541873	0.989406	Up
Hsa-Let-7-P2c1_3p*	1107.64	0.0785116	0.129536	0.606101	0.544448	0.989406	Up
Hsa-Mir-154-P17_3p	49.731	0.266819	0.442454	0.603044	0.546479	0.989406	Up
Hsa-Mir-17-P4d_5p	31978.3	0.113441	0.189454	0.598776	0.549322	0.989406	Up
Hsa-Mir-486_3p*	651.96	0.194286	0.327739	0.592807	0.553311	0.989406	Up
Hsa-Mir-143_5p*	17.6756	0.24782	0.419915	0.590167	0.555079	0.989406	Up
Hsa-Mir-154-P3b_3p	115.652	0.230572	0.398219	0.579007	0.562584	0.989406	Up
Hsa-Mir-32_5p	200.934	0.154066	0.266917	0.577205	0.563801	0.989406	Up
Hsa-Mir-17-P4d_3p*	295.867	0.115336	0.203317	0.567271	0.57053	0.989406	Up
Hsa-Mir-185_5p	9684.73	0.120931	0.215928	0.560052	0.575444	0.989406	Up
Hsa-Mir-28-P1_3p	1225.25	0.147338	0.271995	0.541692	0.588031	0.989406	Up
Hsa-Mir-154-P5_3p	25.5603	0.257747	0.477095	0.540242	0.58903	0.989406	Up
Hsa-Mir-181-P2a_5p	282.69	0.125949	0.23401	0.538221	0.590425	0.989406	Up
Hsa-Mir-877_5p	17.1266	0.175714	0.329865	0.532685	0.594252	0.989406	Up
Hsa-Mir-10-P3b_3p*	9.4328	0.198377	0.372967	0.53189	0.594802	0.989406	Up
Hsa-Mir-191_3p*	73.1117	0.150919	0.294529	0.512409	0.608365	0.989406	Up
Hsa-Mir-28-P2_3p	10320.6	0.111743	0.218076	0.512406	0.608367	0.989406	Up
Hsa-Mir-181-P1a_5p	1804.04	0.113987	0.223739	0.509464	0.610427	0.989406	Up
Hsa-Mir-181-P1b_5p	1804.11	0.113768	0.223705	0.508565	0.611057	0.989406	Up
Hsa-Mir-154-P36_3p	1733.22	0.20848	0.410428	0.507957	0.611484	0.989406	Up
Hsa-Mir-378_3p	865.16	0.100405	0.199046	0.504432	0.613958	0.989406	Up
Hsa-Mir-17-P1d_5p	123.5	-0.145709	0.290038	-0.502379	0.615401	0.989406	Down
Hsa-Mir-191_5p	20832.6	0.091077	0.184194	0.494463	0.620979	0.989406	Up
Hsa-Mir-1-P2_3p	46.2806	-0.213844	0.434497	-0.492165	0.622603	0.989406	Down
Hsa-Mir-7-P2_5p	277.647	0.0995186	0.202487	0.491481	0.623087	0.989406	Up
Hsa-Mir-181-P1c_3p*	22.2496	0.18179	0.372847	0.487572	0.625853	0.989406	Up
Hsa-Mir-505-v1_3p*	38.5669	0.124073	0.259985	0.477232	0.633197	0.989406	Up
Hsa-Mir-96-P2_5p	3227.49	-0.215798	0.457941	-0.471235	0.637473	0.989406	Down
Hsa-Let-7-P2a1_5p	32374.1	0.0961888	0.205248	0.468647	0.639322	0.989406	Up
Hsa-Let-7-P2a2_5p	32407.4	0.0961825	0.205249	0.468615	0.639345	0.989406	Up
Hsa-Let-7-P1d_5p	32360	0.0957504	0.20524	0.466529	0.640837	0.989406	Up
Hsa-Mir-154-P5_5p	92.7276	0.185238	0.403996	0.458515	0.646582	0.989406	Up
Hsa-Mir-30-P2a_5p	108.941	-0.139425	0.305287	-0.456701	0.647886	0.989406	Down
Hsa-Mir-7-P1_5p	269.525	0.0954557	0.212217	0.449802	0.652853	0.989406	Up
Hsa-Mir-7-P4_5p	268.865	0.0959227	0.213522	0.449241	0.653258	0.989406	Up
Hsa-Mir-1307_5p	114.943	-0.128468	0.28702	-0.447592	0.654448	0.989406	Down
Hsa-Mir-221-P2a_3p	11799.7	0.119177	0.27303	0.436497	0.662476	0.989406	Up
Hsa-Mir-148-P4_3p	1849.51	-0.0675583	0.162794	-0.414993	0.678147	0.989406	Down
Hsa-Mir-221-P2a_5p	81.5773	0.132609	0.320034	0.41436	0.67861	0.989406	Up
Hsa-Mir-148-P3_3p	322.732	-0.115898	0.281625	-0.411534	0.680681	0.989406	Down
Hsa-Mir-193-P1a_5p*	23.5307	0.215855	0.537004	0.401961	0.687713	0.989406	Up
Hsa-Mir-21_5p	13854.5	0.0585854	0.145927	0.401472	0.688073	0.989406	Up
Hsa-Mir-132-P1_3p	104.562	-0.0830812	0.207083	-0.401198	0.688274	0.989406	Down
Hsa-Mir-221-P1a_3p	1354.55	0.0737051	0.184902	0.398618	0.690175	0.989406	Up
Hsa-Mir-362-P4_3p	102.15	0.105533	0.266143	0.396528	0.691716	0.989406	Up
Hsa-Mir-154-P15_3p*	386.616	0.156115	0.394009	0.396222	0.691942	0.989406	Up
Hsa-Mir-1301_3p	329.076	0.121606	0.307036	0.396064	0.692058	0.989406	Up
Hsa-Mir-144-v1_3p	620.351	0.145291	0.368478	0.394301	0.693359	0.989406	Up
Hsa-Mir-154-P36_5p*	26.0741	0.16176	0.411349	0.393244	0.69414	0.989406	Up
Hsa-Mir-17-P4c_5p	1042.18	0.11012	0.284689	0.386809	0.698898	0.989406	Up
Hsa-Mir-17-P1d_3p	2368.31	0.103504	0.270683	0.38238	0.702179	0.989406	Up
Hsa-Mir-30-P1d_3p*	296.951	0.0933309	0.245856	0.379616	0.704231	0.989406	Up
Hsa-Mir-190-P1_5p	153.102	0.104412	0.277118	0.376779	0.706338	0.989406	Up
Hsa-Mir-576_5p	578.629	0.114015	0.302914	0.376394	0.706624	0.989406	Up
Hsa-Mir-877_3p*	13.4142	-0.178395	0.480158	-0.371534	0.71024	0.989406	Down
Hsa-Mir-584_5p	3731.16	0.0862528	0.232594	0.37083	0.710764	0.989406	Up
Hsa-Mir-22-P1b_5p*	31.6436	-0.127735	0.345171	-0.370063	0.711335	0.989406	Down
Hsa-Mir-122_5p	38823.9	-0.174038	0.474955	-0.366431	0.714044	0.989406	Down
Hsa-Mir-324_5p	589.099	0.109104	0.298374	0.365661	0.714618	0.989406	Up
Hsa-Mir-130-P4a_3p	180.514	0.0618716	0.169399	0.365243	0.71493	0.989406	Up
Hsa-Mir-188-P2_3p*	225.326	0.101256	0.286439	0.353499	0.723714	0.989406	Up
Hsa-Mir-186_5p	2402.27	0.0526962	0.149111	0.353402	0.723787	0.989406	Up
Hsa-Mir-150_5p	5785.86	0.10515	0.300048	0.350445	0.726005	0.989406	Up
Hsa-Mir-1306_5p	249.529	-0.0951112	0.275597	-0.34511	0.730012	0.989406	Down
Hsa-Mir-188-P2_5p	655.613	0.0901018	0.265779	0.339011	0.734602	0.989406	Up
Hsa-Mir-154-P15_5p	140.921	0.153309	0.454512	0.337305	0.735887	0.989406	Up
Hsa-Let-7-P2c3_5p	8057.32	-0.0594401	0.178005	-0.333923	0.738438	0.989406	Down
Hsa-Mir-342_3p	5844.48	0.0635835	0.190552	0.333681	0.73862	0.989406	Up
Hsa-Mir-1-P3_3p	47.6207	-0.14544	0.438733	-0.3315	0.740267	0.989406	Down
Hsa-Mir-3200_3p	36.7551	0.141893	0.438183	0.323821	0.746074	0.989406	Up
Hsa-Mir-181-P1a_3p*	74.4259	-0.0788873	0.247657	-0.318534	0.75008	0.989406	Down
Hsa-Mir-92-P1d_3p	764.725	0.110605	0.360888	0.30648	0.759239	0.989406	Up
Hsa-Mir-345_5p	176.984	-0.0509416	0.171919	-0.296312	0.766992	0.989406	Down
Hsa-Mir-154-P6_3p	13.0568	-0.143095	0.483699	-0.295834	0.767356	0.989406	Down
Hsa-Mir-96-P3-v1_5p	1622.86	-0.123811	0.426382	-0.290376	0.771528	0.989406	Down
Hsa-Let-7-P1c_5p	1290.22	-0.0667114	0.232982	-0.286337	0.77462	0.989406	Down
Hsa-Mir-374-P2_5p	140.612	-0.0737597	0.259931	-0.283767	0.776589	0.989406	Down
Hsa-Mir-378_5p*	29.2411	0.0791881	0.282883	0.279932	0.779529	0.989406	Up
Hsa-Mir-190-P3_5p	78.9259	0.0580856	0.208459	0.278643	0.780519	0.989406	Up
Hsa-Mir-320-P3_3p	169.94	-0.0881456	0.320215	-0.27527	0.783109	0.989406	Down
Hsa-Mir-1-P1_3p	52.7099	-0.117755	0.436856	-0.26955	0.787506	0.989406	Down
Hsa-Mir-331_3p	49.2966	-0.076098	0.283183	-0.268723	0.788142	0.989406	Down
Hsa-Mir-17-P1c_5p	19.0355	-0.10814	0.408754	-0.26456	0.791348	0.989406	Down
Hsa-Mir-451_5p	65873.9	0.0842426	0.322042	0.261589	0.793638	0.989406	Up
Hsa-Mir-150_3p*	31.203	0.0897897	0.345328	0.260013	0.794854	0.989406	Up
Hsa-Let-7-P2a2_3p*	6.52377	0.0927462	0.363394	0.255222	0.798551	0.989406	Up
Hsa-Mir-1277_5p	60.9713	-0.115786	0.46319	-0.249975	0.802607	0.989406	Down
Hsa-Mir-10-P2c_5p	164.905	-0.0624292	0.25077	-0.24895	0.803399	0.989406	Down
Hsa-Mir-15-P2b_3p*	119.776	0.0819793	0.330689	0.247904	0.804208	0.989406	Up
Hsa-Mir-21_3p*	21.6803	0.0754927	0.306641	0.246193	0.805533	0.989406	Up
Hsa-Mir-1343_3p	12.0203	-0.0824395	0.341907	-0.241117	0.809465	0.989406	Down
Hsa-Mir-320-P4_3p	203.024	-0.0710347	0.295692	-0.240232	0.810151	0.989406	Down
Hsa-Mir-210_3p	77.7506	0.0559971	0.233638	0.239675	0.810582	0.989406	Up
Hsa-Mir-101-P2-v1_3p	4161.17	0.0721762	0.305608	0.236173	0.813299	0.989406	Up
Hsa-Mir-15-P1b_3p*	217.868	-0.0633642	0.270574	-0.234184	0.814842	0.989406	Down
Hsa-Mir-223_5p*	744.893	0.0560241	0.241627	0.231862	0.816645	0.989406	Up
Hsa-Mir-146-P1_5p	974.892	0.0585025	0.266996	0.219114	0.826561	0.989406	Up
Hsa-Mir-101-P1-v1_3p	4056.56	0.0661789	0.305798	0.216414	0.828665	0.989406	Up
Hsa-Mir-134_5p	771.593	0.0873531	0.407653	0.214283	0.830326	0.989406	Up
Hsa-Mir-1294_5p	163.193	0.076962	0.365133	0.210778	0.83306	0.989406	Up
Hsa-Mir-30-P2d_5p	360.69	-0.0476414	0.226242	-0.210577	0.833217	0.989406	Down
Hsa-Mir-30-P2b_5p	360.73	-0.0472328	0.226355	-0.208667	0.834708	0.989406	Down
Hsa-Mir-335_5p	437.632	0.0536541	0.260086	0.206294	0.836561	0.989406	Up
Hsa-Mir-7-P2_3p*	9.78207	-0.0710743	0.344808	-0.206127	0.836692	0.989406	Down
Hsa-Mir-2355_3p	26.184	0.0943393	0.462412	0.204016	0.838341	0.989406	Up
Hsa-Mir-199-P2-v1_5p*	16.0516	0.0853966	0.419758	0.203442	0.838789	0.989406	Up
Hsa-Mir-95-P2_3p	273.755	-0.0351254	0.175217	-0.200468	0.841114	0.989406	Down
Hsa-Mir-193-P1b_5p	289.18	0.0723759	0.369147	0.196062	0.844561	0.989406	Up
Hsa-Mir-590_3p	33.1029	-0.0704831	0.362725	-0.194316	0.845929	0.989406	Down
Hsa-Let-7-P2b1_5p	17665.3	0.0412701	0.213933	0.192911	0.847028	0.989406	Up
Hsa-Mir-197_3p	595.276	-0.0512086	0.269551	-0.189978	0.849327	0.989406	Down
Hsa-Mir-155_5p	1370.16	-0.0332316	0.175732	-0.189104	0.850012	0.989406	Down
Hsa-Mir-10-P2d_5p	100.96	-0.0700937	0.390092	-0.179685	0.8574	0.989406	Down
Hsa-Mir-337-v1_5p	27.2881	0.0713167	0.420894	0.169441	0.86545	0.989406	Up
Hsa-Mir-1287_5p	53.3762	0.0330367	0.195004	0.169416	0.86547	0.989406	Up
Hsa-Mir-766_5p*	12.0269	-0.0778148	0.460856	-0.168848	0.865916	0.989406	Down
Hsa-Mir-340_5p	250.43	0.0433794	0.263003	0.164939	0.868992	0.989406	Up
Hsa-Mir-335_3p	104.995	-0.0502429	0.31582	-0.159087	0.8736	0.989406	Down
Hsa-Mir-188-P3_5p	1665.54	0.0470679	0.297299	0.158319	0.874206	0.989406	Up
Hsa-Mir-128-P1_3p	602.483	0.0191156	0.12626	0.151399	0.879661	0.989406	Up
Hsa-Mir-146-P4_5p	20558.9	0.0472399	0.32487	0.145412	0.884386	0.989406	Up
Hsa-Mir-92-P2c_3p	1824.02	0.0432849	0.301925	0.143363	0.886003	0.989406	Up
Hsa-Mir-3200_5p*	26.9	0.066847	0.485781	0.137607	0.890551	0.989406	Up
Hsa-Mir-326_3p	406.634	-0.0413785	0.305567	-0.135416	0.892283	0.989406	Down
Hsa-Let-7-P1b_5p	1600.92	0.0488937	0.365124	0.13391	0.893474	0.989406	Up
Hsa-Mir-324_3p*	260.18	0.0191903	0.149348	0.128494	0.897758	0.989406	Up
Hsa-Let-7-P2a3_5p	20018.4	0.0272114	0.225131	0.120869	0.903795	0.989406	Up
Hsa-Mir-154-P10_5p	1891.03	0.044143	0.386716	0.114148	0.90912	0.989406	Up
Hsa-Mir-651_5p	11.2717	-0.0356636	0.316862	-0.112553	0.910385	0.989406	Down
Hsa-Mir-652_3p	325.69	0.0152559	0.145409	0.104917	0.916442	0.989406	Up
Hsa-Mir-17-P2a_3p*	149.372	0.0342543	0.326508	0.104911	0.916446	0.989406	Up
Hsa-Let-7-P2c1_5p	9063.42	0.0164888	0.168168	0.0980494	0.921893	0.989406	Up
Hsa-Mir-133-P1-v1_3p	51.414	-0.0348892	0.388813	-0.0897325	0.9285	0.989406	Down
Hsa-Mir-133-P3-v1_3p	51.414	-0.0348892	0.388813	-0.0897325	0.9285	0.989406	Down
Hsa-Mir-26-P2_3p*	44.4062	0.0191565	0.219595	0.0872353	0.930484	0.989406	Up
Hsa-Mir-296_5p	55.6261	0.0276729	0.324262	0.0853413	0.93199	0.989406	Up
Hsa-Mir-362-P2-v1_3p	117.398	0.0210402	0.248344	0.0847217	0.932483	0.989406	Up
Hsa-Mir-148-P1_3p	4918.69	0.0167083	0.202859	0.0823641	0.934357	0.989406	Up
Hsa-Mir-17-P1a_3p*	39.1218	0.0182365	0.224753	0.0811405	0.93533	0.989406	Up
Hsa-Mir-628_3p	235.886	-0.0175569	0.216796	-0.0809837	0.935455	0.989406	Down
Hsa-Mir-103-P4_3p	10314.5	-0.0110405	0.157097	-0.0702782	0.943972	0.989406	Down
Hsa-Mir-142-P1-v1_5p	6957.95	-0.0141967	0.202096	-0.0702472	0.943997	0.989406	Down
Hsa-Mir-320-P2a_3p	285.407	0.0184019	0.274246	0.0670999	0.946502	0.989406	Up
Hsa-Mir-103-P2_3p	10334.1	-0.0104371	0.157304	-0.0663501	0.947099	0.989406	Down
Hsa-Mir-203-v1_3p	50.1592	0.026947	0.423071	0.0636939	0.949214	0.989406	Up
Hsa-Mir-505-v1_5p	93.5822	0.0128993	0.206673	0.0624141	0.950233	0.989406	Up
Hsa-Mir-483_5p	671.182	-0.0316876	0.515945	-0.0614167	0.951027	0.989406	Down
Hsa-Mir-130-P3b_5p*	49.1927	0.0100145	0.185752	0.0539135	0.957004	0.989406	Up
Hsa-Mir-144-v1_5p*	559.99	-0.0195249	0.396149	-0.0492868	0.960691	0.989406	Down
Hsa-Mir-96-P1_5p	434.894	0.0191567	0.389577	0.0491731	0.960781	0.989406	Up
Hsa-Mir-130-P1c_3p	554.86	0.00943583	0.208392	0.0452792	0.963885	0.989406	Up
Hsa-Mir-744_5p	2866.29	-0.00956208	0.256697	-0.0372505	0.970285	0.989406	Down
Hsa-Mir-92-P1d_5p*	89.4296	0.0134675	0.387263	0.0347762	0.972258	0.989406	Up
Hsa-Mir-128-P2_3p	861.266	0.00425622	0.133463	0.0318907	0.974559	0.989406	Up
Hsa-Mir-29-P2b_3p	844.648	0.00510875	0.191609	0.0266624	0.978729	0.989406	Up
Hsa-Mir-130-P4a_5p	75.8158	-0.0050066	0.202895	-0.0246758	0.980314	0.989406	Down
Hsa-Mir-550-P1_3p	23.5316	0.00819241	0.350416	0.0233791	0.981348	0.989406	Up
Hsa-Mir-550-P2a_3p	23.5316	0.00819241	0.350416	0.0233791	0.981348	0.989406	Up
Hsa-Mir-550-P2b_3p	23.5316	0.00819241	0.350416	0.0233791	0.981348	0.989406	Up
Hsa-Mir-320-P2b_3p	288.754	0.00496945	0.273077	0.018198	0.985481	0.989406	Up
Hsa-Mir-17-P4a_5p	3938.67	0.0045045	0.261276	0.0172404	0.986245	0.989406	Up
Hsa-Mir-342_5p*	25.2683	-0.0027299	0.305225	-0.00894389	0.992864	0.992864	Down

## Sheet: C_MB_Vs_Be
	baseMean	log2FoldChange	lfcSE	stat	pvalue	padj	Regulation
Hsa-Mir-375_3p	380.894	-2.39914	0.54981	-4.36358	1.2795e-05	0.00400484	Down
Hsa-Mir-192-P1_5p	32.0364	-2.22645	0.582566	-3.8218	0.000132479	0.0151272	Down
Hsa-Mir-132-P1_3p	104.562	-1.13871	0.2997	-3.7995	0.000144989	0.0151272	Down
Hsa-Mir-8-P2b_3p	52.7453	-1.80385	0.495151	-3.64304	0.000269441	0.0210837	Down
Hsa-Mir-8-P2a_3p	29.6928	-1.56577	0.445029	-3.51836	0.000434226	0.0246977	Down
Hsa-Mir-30-P1b_3p*	43.1386	-1.50901	0.431718	-3.49535	0.000473438	0.0246977	Down
Hsa-Mir-320-P1_3p	15980.8	0.913412	0.278356	3.28145	0.00103274	0.0461782	Up
Hsa-Mir-103-P1_3p	1764.51	1.0756	0.33626	3.19871	0.00138044	0.0540096	Up
Hsa-Mir-130-P4a_3p	180.514	0.73856	0.235474	3.13648	0.00170991	0.0594667	Up
Hsa-Let-7-P2c2_3p*	18.4035	1.67729	0.545461	3.075	0.00210505	0.0656913	Up
Hsa-Mir-15-P1a_5p	1456.45	1.28947	0.423145	3.04736	0.00230864	0.0656913	Up
Hsa-Mir-30-P1b_5p	787.988	-1.00901	0.334766	-3.01406	0.00257775	0.0672364	Down
Hsa-Mir-3613_5p	176.152	1.86027	0.63763	2.91747	0.00352883	0.0833325	Up
Hsa-Mir-17-P2c_3p*	13.6653	1.88371	0.649474	2.90036	0.00372733	0.0833325	Up
Hsa-Let-7-P2c1_5p	9063.42	0.669113	0.236474	2.82954	0.00466149	0.095613	Up
Hsa-Mir-10-P1c-v1_5p	739.331	-0.694025	0.246602	-2.81435	0.00488756	0.095613	Down
Hsa-Mir-21_5p	13854.5	-0.570293	0.205284	-2.77807	0.00546834	0.100682	Down
Hsa-Mir-154-P3b_3p	115.652	-1.53854	0.567525	-2.71097	0.00670874	0.112036	Down
Hsa-Mir-296_5p	55.6261	1.2007	0.448829	2.67517	0.00746905	0.112036	Up
Hsa-Mir-340_5p	250.43	-0.994598	0.372307	-2.67144	0.00755261	0.112036	Down
Hsa-Mir-15-P1b_5p	2255.14	0.959249	0.359395	2.66906	0.00760636	0.112036	Up
Hsa-Mir-17-P4c_5p	1042.18	1.05829	0.400034	2.64549	0.00815724	0.112036	Up
Hsa-Mir-181-P1c_5p	28.7174	-1.43093	0.54295	-2.63547	0.00840208	0.112036	Down
Hsa-Mir-19-P2a_3p	632.641	1.05833	0.405433	2.61037	0.00904455	0.112036	Up
Hsa-Mir-19-P2c_3p	633.927	1.05555	0.404787	2.60767	0.00911614	0.112036	Up
Hsa-Mir-210_3p	77.7506	0.841195	0.323464	2.60058	0.00930654	0.112036	Up
Hsa-Mir-10-P1b-v1_5p	568.721	-1.05611	0.408488	-2.5854	0.00972652	0.112756	Down
Hsa-Mir-17-P4a_5p	3938.67	0.942505	0.367384	2.56545	0.0103042	0.115187	Up
Hsa-Let-7-P2c3_5p	8057.32	0.628042	0.250306	2.5091	0.012104	0.13064	Up
Hsa-Mir-224_5p	1728.39	-1.30766	0.526481	-2.48377	0.0129999	0.135632	Down
Hsa-Mir-362-P2-v1_5p*	4.70406	1.53995	0.628053	2.45194	0.0142088	0.13898	Up
Hsa-Mir-362-P5_5p	4.70406	1.53995	0.628053	2.45194	0.0142088	0.13898	Up
Hsa-Mir-221-P2a_5p	81.5773	-1.11578	0.458114	-2.4356	0.0148671	0.141012	Down
Hsa-Mir-22-P1b_3p	3633.79	0.660251	0.274864	2.4021	0.0163014	0.144044	Up
Hsa-Mir-550-P1_3p	23.5316	1.14192	0.478711	2.38542	0.0170598	0.144044	Up
Hsa-Mir-550-P2a_3p	23.5316	1.14192	0.478711	2.38542	0.0170598	0.144044	Up
Hsa-Mir-550-P2b_3p	23.5316	1.14192	0.478711	2.38542	0.0170598	0.144044	Up
Hsa-Mir-188-P2_3p*	225.326	0.953463	0.40124	2.37629	0.0174878	0.144044	Up
Hsa-Mir-17-P4d_3p*	295.867	0.671319	0.28465	2.3584	0.0183539	0.146725	Up
Hsa-Mir-10-P2c_5p	164.905	-0.836125	0.35573	-2.35045	0.0187508	0.146725	Down
Hsa-Mir-181-P2c_5p	84.2933	-1.23091	0.528089	-2.33087	0.0197602	0.150852	Down
Hsa-Mir-128-P1_3p	602.483	0.406564	0.176821	2.29929	0.0214882	0.160138	Up
Hsa-Mir-324_3p*	260.18	0.471463	0.208403	2.26227	0.0236808	0.171504	Up
Hsa-Mir-30-P1d_3p*	296.951	-0.78214	0.347466	-2.25098	0.0243866	0.171504	Down
Hsa-Mir-15-P2b_3p*	119.776	1.03875	0.462339	2.24673	0.0246571	0.171504	Up
Hsa-Mir-17-P4d_5p	31978.3	0.585913	0.266456	2.19891	0.0278846	0.187592	Up
Hsa-Mir-190-P3_5p	78.9259	0.630462	0.28847	2.18553	0.0288498	0.187592	Up
Hsa-Mir-361-v1_3p*	824.052	0.402064	0.185185	2.17115	0.0299199	0.187592	Up
Hsa-Mir-8-P1b_3p	142.218	-0.694351	0.319897	-2.17054	0.0299656	0.187592	Down
Hsa-Mir-144-v1_5p*	559.99	1.20543	0.556603	2.16568	0.0303354	0.187592	Up
Hsa-Mir-339_3p	231.202	0.396714	0.183437	2.16268	0.0305661	0.187592	Up
Hsa-Mir-19-P1a_3p	267.112	0.892824	0.418559	2.13309	0.0329172	0.198137	Up
Hsa-Mir-483_3p*	128.281	-1.82451	0.860844	-2.11944	0.034053	0.201106	Down
Hsa-Mir-362-P1_5p	25.2636	0.78565	0.378822	2.07393	0.0380857	0.220756	Up
Hsa-Mir-148-P4_3p	1849.51	-0.465988	0.229114	-2.03387	0.0419645	0.238816	Down
Hsa-Mir-17-P2a_5p	302.414	0.531051	0.262876	2.02016	0.0433667	0.242389	Up
Hsa-Mir-628_5p	55.6827	-0.861521	0.432199	-1.99334	0.0462238	0.249472	Down
Hsa-Mir-7-P2_5p	277.647	0.5632	0.283567	1.98613	0.0470191	0.249472	Up
Hsa-Mir-122_5p	38823.9	-1.32678	0.668041	-1.98607	0.0470252	0.249472	Down
Hsa-Mir-28-P2_3p	10320.6	-0.60447	0.306763	-1.97048	0.0487831	0.254485	Down
Hsa-Mir-7-P4_5p	268.865	0.585454	0.299073	1.95756	0.0502811	0.25618	Up
Hsa-Mir-483_5p	671.182	-1.41608	0.726468	-1.94926	0.0512638	0.25618	Down
Hsa-Mir-7-P1_5p	269.525	0.578663	0.297244	1.94676	0.0515634	0.25618	Up
Hsa-Mir-29-P2b_3p	844.648	-0.517245	0.269871	-1.91664	0.0552837	0.270372	Down
Hsa-Mir-505-v1_5p	93.5822	0.546087	0.286852	1.90372	0.056946	0.274217	Up
Hsa-Let-7-P2c1_3p*	1107.64	0.342071	0.181833	1.88123	0.0599402	0.284262	Up
Hsa-Mir-629_5p	896.668	0.636106	0.343386	1.85245	0.0639608	0.298802	Up
Hsa-Mir-95-P1_3p	21.8321	-0.758773	0.415163	-1.82765	0.0676017	0.305921	Down
Hsa-Mir-486_3p*	651.96	0.83961	0.460524	1.82316	0.068279	0.305921	Up
Hsa-Mir-27-P2_3p	1476.82	-0.614427	0.337934	-1.81819	0.0690355	0.305921	Down
Hsa-Mir-885_3p*	23.1171	-1.40866	0.777804	-1.81108	0.0701284	0.305921	Down
Hsa-Mir-3173_5p	40.918	0.695297	0.384246	1.80951	0.0703716	0.305921	Up
Hsa-Mir-30-P1d_5p	11028.5	0.426696	0.237339	1.79783	0.0722036	0.308566	Up
Hsa-Mir-144-v1_3p	620.351	0.924828	0.517825	1.78598	0.0741017	0.308566	Up
Hsa-Mir-130-P3b_3p	872.151	0.519716	0.291406	1.78348	0.0745085	0.308566	Up
Hsa-Mir-155_5p	1370.16	-0.440521	0.247354	-1.78093	0.0749234	0.308566	Down
Hsa-Mir-28-P1_5p	38.1582	-0.884143	0.502888	-1.75813	0.0787249	0.313304	Down
Hsa-Mir-324_5p	589.099	0.73488	0.419164	1.7532	0.0795668	0.313304	Up
Hsa-Mir-199-P1-v1_3p	3329.47	-0.698482	0.400623	-1.74349	0.0812484	0.313304	Down
Hsa-Mir-199-P2-v1_3p	3317.13	-0.69669	0.400162	-1.74102	0.0816796	0.313304	Down
Hsa-Mir-199-P3-v1_3p	3317.13	-0.69669	0.400162	-1.74102	0.0816796	0.313304	Down
Hsa-Mir-15-P2c_5p	80.0397	0.684263	0.393539	1.73875	0.0820795	0.313304	Up
Hsa-Mir-374-P2_5p	140.612	-0.631995	0.367529	-1.71958	0.085509	0.322462	Down
Hsa-Mir-15-P1b_3p*	217.868	0.645631	0.379154	1.70282	0.0886013	0.326546	Up
Hsa-Mir-188-P2_5p	655.613	0.634392	0.373371	1.69909	0.0893015	0.326546	Up
Hsa-Mir-186_5p	2402.27	0.355625	0.209578	1.69687	0.0897219	0.326546	Up
Hsa-Mir-95-P2_3p	273.755	0.410802	0.245201	1.67537	0.0938619	0.326592	Up
Hsa-Mir-885_5p	16.7513	-1.35729	0.81233	-1.67086	0.0947493	0.326592	Down
Hsa-Mir-214-v1_3p	12.5856	-1.02362	0.613407	-1.66874	0.0951687	0.326592	Down
Hsa-Mir-181-P2a_5p	282.69	-0.547704	0.330337	-1.65802	0.0973142	0.326592	Down
Hsa-Mir-15-P2a_5p	300662	0.635395	0.383569	1.65653	0.0976136	0.326592	Up
Hsa-Mir-15-P2b_5p	300611	0.63547	0.383723	1.65607	0.0977082	0.326592	Up
Hsa-Mir-33-P3_5p	10.6475	-0.811816	0.491817	-1.65065	0.0988106	0.326592	Down
Hsa-Mir-223_5p*	744.893	-0.559179	0.340249	-1.64344	0.100292	0.326592	Down
Hsa-Mir-146-P1_3p*	36.0391	-0.488811	0.298044	-1.64006	0.100992	0.326592	Down
Hsa-Mir-181-P1b_5p	1804.11	-0.515025	0.314821	-1.63593	0.101855	0.326592	Down
Hsa-Mir-181-P1a_5p	1804.04	-0.514807	0.314869	-1.63498	0.102052	0.326592	Down
Hsa-Mir-342_3p	5844.48	-0.43801	0.268057	-1.63402	0.102255	0.326592	Down
Hsa-Mir-154-P5_5p	92.7276	-0.92294	0.572383	-1.61245	0.106864	0.337863	Down
Hsa-Mir-339_5p	1342.16	0.401596	0.251994	1.59367	0.11101	0.347461	Up
Hsa-Mir-190-P1_5p	153.102	0.614762	0.387901	1.58484	0.113002	0.350195	Up
Hsa-Mir-130-P1c_3p	554.86	0.455295	0.292563	1.55623	0.119653	0.367172	Up
Hsa-Mir-203-v1_3p	50.1592	-0.930947	0.601291	-1.54825	0.121563	0.368638	Down
Hsa-Mir-181-P2b_5p	300.634	-0.4997	0.323552	-1.54442	0.122487	0.368638	Down
Hsa-Mir-185_5p	9684.73	0.464332	0.303675	1.52904	0.126253	0.376356	Up
Hsa-Mir-92-P2d_3p	29305.4	0.581304	0.382285	1.5206	0.128359	0.379023	Up
Hsa-Mir-2355_3p	26.184	-0.993635	0.662496	-1.49984	0.133657	0.390978	Down
Hsa-Mir-345_5p	176.984	0.356153	0.240004	1.48395	0.137822	0.39943	Up
Hsa-Mir-1249_3p	8.95109	-1.21534	0.846086	-1.43642	0.150882	0.433267	Down
Hsa-Mir-154-P5_3p	25.5603	-0.982275	0.687015	-1.42977	0.152782	0.434735	Down
Hsa-Mir-1277_5p	60.9713	-0.92505	0.655787	-1.41059	0.158364	0.443107	Down
Hsa-Mir-96-P1_5p	434.894	0.770519	0.547367	1.40768	0.159225	0.443107	Up
Hsa-Mir-29-P1d-v1_3p	155.974	0.541356	0.388522	1.39337	0.163507	0.443107	Up
Hsa-Mir-130-P4a_5p	75.8158	-0.400795	0.288304	-1.39018	0.164474	0.443107	Down
Hsa-Mir-29-P1b-v1_3p	155.851	0.540373	0.388851	1.38967	0.16463	0.443107	Up
Hsa-Mir-154-P36_5p*	26.0741	-0.819514	0.5903	-1.3883	0.165045	0.443107	Down
Hsa-Mir-877_5p	17.1266	-0.665828	0.480268	-1.38637	0.165634	0.443107	Down
Hsa-Mir-128-P2_3p	861.266	0.25707	0.187328	1.3723	0.169971	0.450855	Up
Hsa-Mir-34-P1_5p	76.4928	-0.658039	0.481639	-1.36625	0.17186	0.451523	Down
Hsa-Mir-15-P1c_5p	41.5377	0.856818	0.628957	1.36228	0.173108	0.451523	Up
Hsa-Mir-103-P4_3p	10314.5	0.296706	0.220926	1.34301	0.179269	0.463728	Up
Hsa-Mir-103-P2_3p	10334.1	0.295635	0.221217	1.3364	0.181418	0.464561	Up
Hsa-Mir-17-P1d_5p	123.5	0.540796	0.405724	1.33292	0.182559	0.464561	Up
Hsa-Mir-32_5p	200.934	0.495712	0.374256	1.32453	0.185329	0.467806	Up
Hsa-Mir-181-P1c_3p*	22.2496	-0.702666	0.536881	-1.30879	0.190604	0.477274	Down
Hsa-Mir-10-P2b_5p	1040.19	-0.538373	0.416705	-1.29198	0.196366	0.487797	Down
Hsa-Mir-574_3p	221.922	0.461197	0.359429	1.28314	0.199444	0.491542	Up
Hsa-Mir-378_5p*	29.2411	0.485264	0.390754	1.24186	0.214287	0.516231	Up
Hsa-Mir-3200_3p	36.7551	0.75635	0.611035	1.23782	0.215784	0.516231	Up
Hsa-Mir-140-P1-v1_3p	5506.33	0.296754	0.240564	1.23358	0.217361	0.516231	Up
Hsa-Mir-28-P1_3p	1225.25	-0.468182	0.382753	-1.2232	0.221256	0.516231	Down
Hsa-Mir-191_3p*	73.1117	-0.510823	0.417623	-1.22317	0.221266	0.516231	Down
Hsa-Let-7-P2a2_3p*	6.52377	0.596314	0.487695	1.22272	0.221436	0.516231	Up
Hsa-Mir-146-P1_5p	974.892	-0.459314	0.375736	-1.22244	0.221542	0.516231	Down
Hsa-Mir-21_3p*	21.6803	-0.537916	0.441097	-1.2195	0.222656	0.516231	Down
Hsa-Mir-1306_3p*	95.3497	-0.704016	0.580658	-1.21245	0.225342	0.518618	Down
Hsa-Mir-92-P2d_5p*	123.595	0.47227	0.392095	1.20448	0.228404	0.521829	Up
Hsa-Mir-154-P15_5p	140.921	-0.765121	0.641225	-1.19322	0.232784	0.527982	Down
Hsa-Mir-23-P2_5p*	14.8345	0.559872	0.472158	1.18577	0.235712	0.530776	Up
Hsa-Mir-652_3p	325.69	0.238036	0.203615	1.16905	0.242383	0.5419	Up
Hsa-Mir-221-P2a_3p	11799.7	-0.446915	0.384036	-1.16373	0.244533	0.542453	Down
Hsa-Mir-451_5p	65873.9	0.525369	0.452951	1.15988	0.246097	0.542453	Up
Hsa-Mir-22-P1b_5p*	31.6436	0.552237	0.478663	1.15371	0.24862	0.543218	Up
Hsa-Mir-130-P2b_3p	111.401	0.466047	0.405062	1.15056	0.249915	0.543218	Up
Hsa-Mir-181-P1a_3p*	74.4259	-0.401074	0.350163	-1.14539	0.252047	0.544074	Down
Hsa-Mir-10-P3b_5p	4402.48	-0.422554	0.37128	-1.1381	0.255079	0.546689	Down
Hsa-Mir-205-P4_5p	102.014	-0.56176	0.497084	-1.13011	0.25843	0.546689	Down
Hsa-Mir-126-P2-v1_3p	46553.5	-0.377698	0.334261	-1.12995	0.258498	0.546689	Down
Hsa-Mir-154-P6_3p	13.0568	-0.774187	0.693399	-1.11651	0.264204	0.554126	Down
Hsa-Mir-423_3p	5290.44	-0.325545	0.2924	-1.11336	0.265556	0.554126	Down
Hsa-Mir-766_3p	44.0825	-0.542397	0.490443	-1.10593	0.268756	0.55709	Down
Hsa-Mir-130-P3b_5p*	49.1927	-0.289102	0.264197	-1.09426	0.273839	0.563442	Down
Hsa-Mir-204-P2_5p	18.6954	-0.559384	0.512884	-1.09066	0.275421	0.563442	Down
Hsa-Mir-185_3p*	247.155	0.257996	0.239184	1.07865	0.280743	0.570602	Up
Hsa-Mir-1307_5p	114.943	-0.433307	0.404674	-1.07075	0.28428	0.574062	Down
Hsa-Mir-142-P1-v1_3p*	13076.6	-0.449441	0.424382	-1.05905	0.289577	0.577813	Down
Hsa-Mir-17-P1a_3p*	39.1218	0.329324	0.311201	1.05824	0.289947	0.577813	Up
Hsa-Mir-486_5p	401237	0.534403	0.506806	1.05445	0.291676	0.577813	Up
Hsa-Mir-769_5p	108.752	-0.369593	0.354074	-1.04383	0.296564	0.583803	Down
Hsa-Mir-154-P18_3p	55.4454	0.632594	0.609066	1.03863	0.298977	0.584874	Up
Hsa-Mir-140-P1-v1_5p*	269.976	0.207283	0.201317	1.02963	0.303182	0.589415	Up
Hsa-Mir-134_5p	771.593	-0.582405	0.573618	-1.01532	0.309954	0.598862	Down
Hsa-Mir-1343_3p	12.0203	-0.493946	0.49314	-1.00164	0.31652	0.607796	Down
Hsa-Mir-335_3p	104.995	-0.441393	0.445492	-0.9908	0.321783	0.613971	Down
Hsa-Mir-1306_5p	249.529	0.381613	0.386652	0.986967	0.323659	0.613971	Up
Hsa-Let-7-P2c2_5p	42123.1	0.220422	0.227179	0.970257	0.331918	0.622334	Up
Hsa-Mir-194-P2_5p	270.822	0.41398	0.426782	0.970004	0.332044	0.622334	Up
Hsa-Mir-15-P1d_5p	9.73856	-0.701251	0.731281	-0.958934	0.337592	0.628966	Down
Hsa-Mir-320-P3_3p	169.94	-0.430212	0.451096	-0.953702	0.340234	0.630138	Down
Hsa-Mir-194-P1_5p	263.124	0.400124	0.422442	0.947169	0.343553	0.630791	Up
Hsa-Mir-142-P1-v1_5p	6957.95	0.267718	0.284216	0.941953	0.346217	0.630791	Up
Hsa-Mir-584_5p	3731.16	-0.306313	0.327182	-0.936214	0.349163	0.630791	Down
Hsa-Mir-491_5p	74.0377	0.329357	0.353048	0.932896	0.350874	0.630791	Up
Hsa-Mir-199-P1-v1_5p*	101.563	-0.448525	0.482593	-0.929406	0.352679	0.630791	Down
Hsa-Mir-199-P3-v1_5p*	101.563	-0.448525	0.482593	-0.929406	0.352679	0.630791	Down
Hsa-Mir-17-P1c_5p	19.0355	-0.535453	0.58192	-0.920149	0.357495	0.631957	Down
Hsa-Mir-17-P1a_5p	1070.66	0.235866	0.256417	0.919855	0.357649	0.631957	Up
Hsa-Mir-23-P2_3p	1023.44	-0.287754	0.313966	-0.916511	0.359399	0.631957	Down
Hsa-Mir-10-P2b_3p*	33.4472	-0.554453	0.607494	-0.912688	0.361407	0.631957	Down
Hsa-Mir-154-P10_5p	1891.03	-0.489372	0.544001	-0.89958	0.368344	0.637009	Down
Hsa-Mir-671_5p	192.66	-0.381559	0.424992	-0.897803	0.36929	0.637009	Down
Hsa-Mir-197_3p	595.276	0.338038	0.37874	0.892533	0.372107	0.637009	Up
Hsa-Mir-26-P1_3p*	18.0093	-0.468702	0.525499	-0.891919	0.372437	0.637009	Down
Hsa-Mir-26-P4_5p	11089	-0.282811	0.321372	-0.880011	0.378853	0.637146	Down
Hsa-Mir-15-P2d_5p	21.7288	-0.479532	0.547046	-0.876585	0.380712	0.637146	Down
Hsa-Mir-221-P1a_3p	1354.55	-0.227451	0.260146	-0.874321	0.381944	0.637146	Down
Hsa-Mir-10-P3d_5p	519.921	-0.361999	0.415163	-0.871943	0.383239	0.637146	Down
Hsa-Mir-26-P1_5p	10870.2	-0.278317	0.319633	-0.870741	0.383896	0.637146	Down
Hsa-Mir-10-P3c_5p	518.004	-0.36142	0.415986	-0.868827	0.384942	0.637146	Down
Hsa-Mir-154-P9_3p	160.557	-0.467778	0.542901	-0.861627	0.388893	0.637146	Down
Hsa-Mir-196-P1_5p	342.89	0.273935	0.317988	0.861465	0.388982	0.637146	Up
Hsa-Mir-143_3p	1336.22	-0.380081	0.442934	-0.8581	0.390837	0.637146	Down
Hsa-Mir-126-P2-v1_5p*	5769.58	-0.248242	0.295114	-0.841172	0.400251	0.648143	Down
Hsa-Let-7-P2a3_5p	20018.4	-0.262971	0.316654	-0.83047	0.406273	0.648143	Down
Hsa-Mir-154-P15_3p*	386.616	-0.459568	0.554596	-0.828654	0.4073	0.648143	Down
Hsa-Mir-23-P3_3p	5605.28	-0.310005	0.374118	-0.82863	0.407314	0.648143	Down
Hsa-Mir-29-P2d_3p	983.703	0.23577	0.28513	0.826887	0.408301	0.648143	Up
Hsa-Mir-423_5p	41415.6	0.374187	0.455441	0.821594	0.411308	0.648143	Up
Hsa-Mir-148-P4_5p*	36.9784	-0.32789	0.399748	-0.820242	0.412078	0.648143	Down
Hsa-Mir-188-P3_5p	1665.54	0.340267	0.418045	0.813947	0.415675	0.650532	Up
Hsa-Mir-362-P4_3p	102.15	0.299197	0.372772	0.802626	0.422191	0.657442	Up
Hsa-Mir-148-P3_3p	322.732	-0.316004	0.396303	-0.79738	0.42523	0.658897	Down
Hsa-Mir-197_5p*	7.90159	0.450597	0.574669	0.784098	0.432982	0.664541	Up
Hsa-Mir-30-P2d_5p	360.69	0.247972	0.317648	0.780648	0.435009	0.664541	Up
Hsa-Mir-30-P2b_5p	360.73	0.247971	0.317808	0.780252	0.435242	0.664541	Up
Hsa-Mir-1-P2_3p	46.2806	-0.471954	0.612715	-0.770267	0.441141	0.670278	Down
Hsa-Mir-139_3p*	358.539	-0.378016	0.495043	-0.763603	0.445104	0.671654	Down
Hsa-Mir-1180_3p	599.458	0.413147	0.543885	0.759622	0.447481	0.671654	Up
Hsa-Mir-1307_3p*	2726.33	-0.308465	0.406976	-0.757944	0.448484	0.671654	Down
Hsa-Mir-181-P1b_3p*	167.552	-0.200494	0.267849	-0.748531	0.45414	0.676885	Down
Hsa-Let-7-P2b2_5p	130853	0.323693	0.436655	0.741301	0.458511	0.678656	Up
Hsa-Mir-92-P1c_3p	75771.4	0.315823	0.427135	0.739398	0.459665	0.678656	Up
Hsa-Mir-338-P2_3p	50.2663	-0.453824	0.620663	-0.731193	0.464661	0.680875	Down
Hsa-Mir-92-P1a_3p	78428	0.303121	0.415353	0.729791	0.465518	0.680875	Up
Hsa-Let-7-P2b1_5p	17665.3	-0.215521	0.300902	-0.716249	0.473838	0.68982	Down
Hsa-Mir-505-v1_3p*	38.5669	0.257893	0.362289	0.711843	0.476562	0.690573	Up
Hsa-Mir-26-P2_5p	18293.7	-0.176515	0.252679	-0.698575	0.484818	0.6993	Down
Hsa-Mir-193-P1a_5p*	23.5307	-0.525022	0.763445	-0.6877	0.491642	0.703994	Down
Hsa-Mir-92-P2c_3p	1824.02	0.28956	0.424571	0.682005	0.495236	0.703994	Up
Hsa-Let-7-P1b_5p	1600.92	-0.348523	0.513615	-0.678568	0.497411	0.703994	Down
Hsa-Mir-337-v1_5p	27.2881	0.3953	0.587511	0.672839	0.50105	0.703994	Up
Hsa-Mir-30-P2a_5p	108.941	0.287538	0.427797	0.672137	0.501497	0.703994	Up
Hsa-Mir-877_3p*	13.4142	0.443579	0.66212	0.669938	0.502897	0.703994	Up
Hsa-Let-7-P2b3_5p	822.682	0.208046	0.311216	0.668496	0.503817	0.703994	Up
Hsa-Mir-425_3p*	496.281	-0.180899	0.284537	-0.635764	0.52493	0.729105	Down
Hsa-Mir-154-P17_3p	49.731	-0.395969	0.625109	-0.63344	0.526446	0.729105	Down
Hsa-Mir-760_3p	76.7887	-0.291854	0.467425	-0.624388	0.532373	0.734065	Down
Hsa-Mir-199-P2-v1_5p*	16.0516	0.359045	0.584027	0.614774	0.538704	0.737771	Up
Hsa-Mir-101-P2-v1_3p	4161.17	0.262778	0.429806	0.611387	0.540944	0.737771	Up
Hsa-Mir-589_5p	76.632	0.13877	0.227667	0.609532	0.542172	0.737771	Up
Hsa-Mir-133-P1-v1_3p	51.414	0.327094	0.544364	0.600875	0.547924	0.737771	Up
Hsa-Mir-133-P3-v1_3p	51.414	0.327094	0.544364	0.600875	0.547924	0.737771	Up
Hsa-Mir-146-P4_5p	20558.9	-0.272799	0.456935	-0.597018	0.550495	0.737771	Down
Hsa-Mir-1-P3_3p	47.6207	0.365597	0.614011	0.595424	0.55156	0.737771	Up
Hsa-Mir-101-P1-v1_3p	4056.56	0.254259	0.430074	0.591199	0.554387	0.738396	Up
Hsa-Mir-3138_3p	45.3814	0.238778	0.408102	0.585094	0.558485	0.738896	Up
Hsa-Mir-10-P2d_5p	100.96	-0.320541	0.549239	-0.583609	0.559484	0.738896	Down
Hsa-Mir-154-P13-v1_5p	58.1142	-0.334101	0.576934	-0.579098	0.562523	0.739102	Down
Hsa-Mir-154-P36_3p	1733.22	-0.332761	0.577335	-0.576375	0.564362	0.739102	Down
Hsa-Mir-425_5p	17835	0.154111	0.280312	0.549782	0.582469	0.756017	Up
Hsa-Mir-150_3p*	31.203	-0.266377	0.48842	-0.545387	0.585488	0.756017	Down
Hsa-Mir-139_5p	83.8792	-0.21523	0.39638	-0.542989	0.587137	0.756017	Down
Hsa-Let-7-P2a1_5p	32374.1	0.154933	0.288678	0.536698	0.591476	0.756017	Up
Hsa-Let-7-P1d_5p	32360	0.154759	0.288666	0.536116	0.591878	0.756017	Up
Hsa-Mir-1-P1_3p	52.7099	0.326695	0.611868	0.53393	0.59339	0.756017	Up
Hsa-Let-7-P2a2_5p	32407.4	0.153802	0.288679	0.53278	0.594186	0.756017	Up
Hsa-Mir-17-P1d_3p	2368.31	0.196241	0.380665	0.515521	0.606189	0.768167	Up
Hsa-Mir-1294_5p	163.193	0.259889	0.512843	0.506762	0.612322	0.77281	Up
Hsa-Mir-1908_5p	192.674	-0.21906	0.445794	-0.491392	0.623149	0.783316	Down
Hsa-Mir-361-v1_5p	1549.2	0.10442	0.21621	0.482956	0.629127	0.78551	Up
Hsa-Mir-127_3p	599.088	0.28389	0.591413	0.480019	0.631214	0.78551	Up
Hsa-Mir-431_5p	479.01	-0.279185	0.58368	-0.478319	0.632423	0.78551	Down
Hsa-Mir-10-P3b_3p*	9.4328	0.240853	0.517463	0.465449	0.64161	0.79377	Up
Hsa-Mir-651_5p	11.2717	0.200859	0.437473	0.459136	0.646137	0.796223	Up
Hsa-Mir-154-P7_5p	230.206	-0.238156	0.551537	-0.431804	0.665884	0.81734	Down
Hsa-Mir-29-P2d_5p*	79.929	0.125846	0.314065	0.400701	0.68864	0.84197	Up
Hsa-Mir-320-P2b_3p	288.754	0.147869	0.383641	0.385435	0.699915	0.848606	Up
Hsa-Mir-378_3p	865.16	-0.106696	0.279981	-0.381084	0.703141	0.848606	Down
Hsa-Mir-191_5p	20832.6	0.098574	0.259063	0.380501	0.703573	0.848606	Up
Hsa-Mir-493_3p*	59.8176	-0.220788	0.595008	-0.371067	0.710588	0.848606	Down
Hsa-Mir-320-P2a_3p	285.407	0.142964	0.3853	0.371047	0.710603	0.848606	Up
Hsa-Mir-342_5p*	25.2683	0.157754	0.425358	0.370875	0.710731	0.848606	Up
Hsa-Mir-7-P2_3p*	9.78207	-0.174822	0.487319	-0.358743	0.719787	0.848606	Down
Hsa-Mir-154-P3a-v1_3p	61.0054	-0.226249	0.631934	-0.358026	0.720324	0.848606	Down
Hsa-Mir-96-P2_5p	3227.49	0.22845	0.644059	0.354703	0.722812	0.848606	Up
Hsa-Mir-326_3p	406.634	-0.152115	0.429781	-0.353935	0.723387	0.848606	Down
Hsa-Mir-96-P3-v1_5p	1622.86	0.211831	0.599638	0.353264	0.72389	0.848606	Up
Hsa-Mir-766_5p*	12.0269	0.222027	0.641205	0.346266	0.729143	0.848636	Up
Hsa-Mir-17-P2a_3p*	149.372	0.158107	0.458561	0.344789	0.730253	0.848636	Up
Hsa-Mir-3200_5p*	26.9	0.230592	0.680381	0.338916	0.734673	0.848636	Up
Hsa-Mir-874_3p	47.878	0.116599	0.344153	0.338799	0.734761	0.848636	Up
Hsa-Mir-432_5p	1659.94	0.205287	0.624625	0.328656	0.742416	0.854324	Up
Hsa-Mir-148-P1_3p	4918.69	-0.0917488	0.285318	-0.321566	0.747781	0.854741	Down
Hsa-Let-7-P1c_5p	1290.22	-0.1042	0.32766	-0.318013	0.750475	0.854741	Down
Hsa-Mir-335_5p	437.632	-0.116099	0.365828	-0.31736	0.75097	0.854741	Down
Hsa-Mir-92-P1d_3p	764.725	-0.159144	0.507632	-0.313502	0.753899	0.85487	Down
Hsa-Mir-362-P2-v1_3p	117.398	0.108016	0.348417	0.310019	0.756546	0.85487	Up
Hsa-Mir-590_3p	33.1029	-0.155706	0.510263	-0.305149	0.760253	0.855968	Down
Hsa-Mir-30-P1a_5p	33076.7	0.0479286	0.179684	0.266738	0.789671	0.885904	Up
Hsa-Mir-28-P2_5p	347.335	-0.0812013	0.314035	-0.258574	0.795964	0.889774	Down
Hsa-Mir-27-P3_3p	690.349	-0.111322	0.440361	-0.252796	0.800426	0.891577	Down
Hsa-Mir-328_3p	1843.31	-0.0800423	0.340404	-0.235139	0.814101	0.895245	Down
Hsa-Mir-223_3p	50728.3	-0.0894387	0.38426	-0.232756	0.815951	0.895245	Down
Hsa-Mir-193-P1b_5p	289.18	-0.120384	0.519244	-0.231845	0.816659	0.895245	Down
Hsa-Mir-193-P2a_3p	12.3696	0.120518	0.533215	0.226021	0.821185	0.895245	Up
Hsa-Mir-193-P2b_3p	12.3696	0.120518	0.533215	0.226021	0.821185	0.895245	Up
Hsa-Mir-744_5p	2866.29	-0.0783547	0.361034	-0.217029	0.828186	0.895245	Down
Hsa-Mir-1287_5p	53.3762	0.0588029	0.272861	0.215505	0.829374	0.895245	Up
Hsa-Mir-1296_5p	34.6544	-0.0732623	0.340054	-0.215443	0.829422	0.895245	Down
Hsa-Mir-320-P4_3p	203.024	-0.0895444	0.415723	-0.215394	0.82946	0.895245	Down
Hsa-Mir-628_3p	235.886	-0.0583933	0.30473	-0.191623	0.848038	0.908311	Down
Hsa-Mir-150_5p	5785.86	0.0805069	0.422007	0.190771	0.848705	0.908311	Up
Hsa-Mir-92-P1d_5p*	89.4296	0.102676	0.543916	0.188772	0.850272	0.908311	Up
Hsa-Let-7-P2b2_3p*	37.6852	0.0639857	0.364577	0.175506	0.860682	0.916304	Up
Hsa-Mir-374-P1_5p	305.002	-0.0553991	0.34116	-0.162385	0.871003	0.922306	Down
Hsa-Mir-26-P2_3p*	44.4062	0.0483883	0.307317	0.157454	0.874887	0.922306	Up
Hsa-Mir-370_3p	307.924	0.0891277	0.567302	0.157108	0.87516	0.922306	Up
Hsa-Mir-1301_3p	329.076	0.0640259	0.43167	0.148321	0.882089	0.923359	Up
Hsa-Mir-1270_5p	37.923	-0.0665428	0.455571	-0.146065	0.88387	0.923359	Down
Hsa-Mir-154-P23_3p	303.679	-0.0866841	0.599379	-0.144623	0.885008	0.923359	Down
Hsa-Mir-493_5p	55.2043	0.0868542	0.620469	0.139982	0.888675	0.924103	Up
Hsa-Mir-192-P2_5p	1931.35	-0.0513426	0.389014	-0.131981	0.894999	0.925805	Down
Hsa-Mir-671_3p	81.2651	-0.0596231	0.466003	-0.127946	0.898192	0.925805	Down
Hsa-Mir-145_5p	111.867	-0.0737565	0.582175	-0.126691	0.899185	0.925805	Down
Hsa-Mir-143_5p*	17.6756	0.0700514	0.589866	0.118758	0.905467	0.929039	Up
Hsa-Mir-331_3p	49.2966	0.0457092	0.396674	0.115231	0.908262	0.929039	Up
Hsa-Mir-24-P2_3p	2448.35	0.0367617	0.354723	0.103635	0.917459	0.93453	Up
Hsa-Mir-24-P3_3p	2413.05	0.0355229	0.351933	0.100936	0.919601	0.93453	Up
Hsa-Mir-3187_3p	43.4389	-0.0313875	0.416299	-0.0753965	0.939899	0.952066	Down
Hsa-Mir-362-P3_3p	384.042	-0.0305749	0.45372	-0.0673871	0.946274	0.955431	Down
Hsa-Mir-598_3p	73.174	-0.0183586	0.332019	-0.0552939	0.955904	0.962052	Down
Hsa-Mir-576_5p	578.629	-0.0218243	0.426012	-0.0512292	0.959143	0.962217	Down
Hsa-Mir-132-P1_5p*	4.56391	0.00254435	0.602065	0.00422604	0.996628	0.996628	Up

## Sheet: D_CA_Vs_HB
	baseMean	log2FoldChange	lfcSE	stat	pvalue	padj	Regulation
Hsa-Mir-17-P4a_5p	3938.67	-0.677042	0.26141	-2.58996	0.00959861	0.667201	Down
Hsa-Mir-15-P1c_5p	41.5377	-1.15669	0.459786	-2.51571	0.0118792	0.667201	Down
Hsa-Mir-10-P2c_5p	164.905	0.606972	0.250329	2.4247	0.0153212	0.667201	Up
Hsa-Mir-130-P1c_3p	554.86	-0.49576	0.209256	-2.36916	0.0178285	0.667201	Down
Hsa-Mir-122_5p	38823.9	1.08512	0.474952	2.28469	0.022331	0.667201	Up
Hsa-Mir-885_5p	16.7513	1.30812	0.574865	2.27552	0.0228749	0.667201	Up
Hsa-Mir-95-P2_3p	273.755	-0.399136	0.177073	-2.25407	0.0241915	0.667201	Down
Hsa-Mir-19-P2c_3p	633.927	-0.628646	0.288768	-2.17699	0.0294811	0.667201	Down
Hsa-Mir-19-P2a_3p	632.641	-0.625471	0.289227	-2.16256	0.0305752	0.667201	Down
Hsa-Mir-15-P1a_5p	1456.45	-0.648191	0.301254	-2.15164	0.0314256	0.667201	Down
Hsa-Mir-130-P4a_5p	75.8158	0.427362	0.202518	2.11024	0.0348373	0.667201	Up
Hsa-Mir-128-P1_3p	602.483	-0.267502	0.127131	-2.10415	0.0353653	0.667201	Down
Hsa-Mir-877_3p*	13.4142	0.987197	0.47386	2.08331	0.0372232	0.667201	Up
Hsa-Mir-28-P1_5p	38.1582	0.725564	0.352406	2.05889	0.039505	0.667201	Up
Hsa-Mir-185_5p	9684.73	-0.430602	0.215965	-1.99385	0.0461685	0.667201	Down
Hsa-Mir-15-P2a_5p	300662	-0.533995	0.272712	-1.95809	0.050219	0.667201	Down
Hsa-Mir-15-P2b_5p	300611	-0.534084	0.272821	-1.95763	0.050273	0.667201	Down
Hsa-Mir-423_3p	5290.44	0.403252	0.207844	1.94017	0.0523591	0.667201	Up
Hsa-Mir-199-P2-v1_5p*	16.0516	-0.852243	0.439542	-1.93894	0.0525091	0.667201	Down
Hsa-Mir-3613_5p	176.152	-0.882062	0.455198	-1.93775	0.0526534	0.667201	Down
Hsa-Mir-34-P1_5p	76.4928	0.660447	0.344135	1.91915	0.0549651	0.667201	Up
Hsa-Mir-132-P1_3p	104.562	0.395805	0.207239	1.9099	0.0561458	0.667201	Up
Hsa-Mir-186_5p	2402.27	-0.284034	0.149294	-1.90251	0.0571043	0.667201	Down
Hsa-Let-7-P2c2_3p*	18.4035	-0.784538	0.412588	-1.9015	0.057236	0.667201	Down
Hsa-Mir-140-P1-v1_3p	5506.33	-0.325022	0.171129	-1.89928	0.0575272	0.667201	Down
Hsa-Let-7-P2a3_5p	20018.4	0.417272	0.225129	1.85348	0.0638136	0.667201	Up
Hsa-Mir-7-P2_5p	277.647	-0.365264	0.203756	-1.79266	0.0730278	0.667201	Down
Hsa-Mir-877_5p	17.1266	-0.616219	0.34432	-1.78967	0.0735068	0.667201	Down
Hsa-Mir-221-P1a_3p	1354.55	0.329533	0.184875	1.78246	0.0746739	0.667201	Up
Hsa-Mir-7-P1_5p	269.525	-0.379958	0.21351	-1.77958	0.0751441	0.667201	Down
Hsa-Mir-15-P2c_5p	80.0397	-0.502451	0.283393	-1.77298	0.0762314	0.667201	Down
Hsa-Mir-92-P2d_3p	29305.4	-0.481729	0.271813	-1.77228	0.0763479	0.667201	Down
Hsa-Mir-7-P4_5p	268.865	-0.379776	0.21481	-1.76797	0.0770666	0.667201	Down
Hsa-Mir-29-P1d-v1_3p	155.974	-0.486237	0.279021	-1.74266	0.0813935	0.667201	Down
Hsa-Mir-130-P2b_3p	111.401	-0.511207	0.294017	-1.7387	0.0820876	0.667201	Down
Hsa-Mir-29-P1b-v1_3p	155.851	-0.484583	0.27925	-1.7353	0.0826877	0.667201	Down
Hsa-Mir-29-P2d_5p*	79.929	-0.392205	0.22709	-1.72709	0.0841518	0.667201	Down
Hsa-Let-7-P2b1_5p	17665.3	0.369151	0.213931	1.72556	0.0844264	0.667201	Up
Hsa-Let-7-P1c_5p	1290.22	0.399931	0.232982	1.71657	0.0860575	0.667201	Up
Hsa-Mir-17-P4d_3p*	295.867	-0.350803	0.204457	-1.71578	0.0862019	0.667201	Down
Hsa-Mir-1908_5p	192.674	0.538095	0.315241	1.70693	0.0878354	0.667201	Up
Hsa-Mir-103-P1_3p	1764.51	-0.404066	0.239447	-1.6875	0.0915077	0.667201	Down
Hsa-Mir-17-P4d_5p	31978.3	-0.315266	0.189465	-1.66398	0.0961164	0.667201	Down
Hsa-Mir-193-P1a_5p*	23.5307	0.8829	0.531348	1.66162	0.0965888	0.667201	Up
Hsa-Mir-130-P4a_3p	180.514	-0.28491	0.171522	-1.66107	0.0966991	0.667201	Down
Hsa-Mir-19-P1a_3p	267.112	-0.495455	0.299485	-1.65436	0.0980551	0.667201	Down
Hsa-Let-7-P2c1_5p	9063.42	-0.273136	0.168215	-1.62373	0.104432	0.682192	Down
Hsa-Mir-133-P1-v1_3p	51.414	-0.636675	0.394923	-1.61215	0.106929	0.682192	Down
Hsa-Mir-133-P3-v1_3p	51.414	-0.636675	0.394923	-1.61215	0.106929	0.682192	Down
Hsa-Mir-30-P1d_5p	11028.5	-0.269499	0.168795	-1.59661	0.110353	0.682192	Down
Hsa-Mir-128-P2_3p	861.266	-0.212426	0.133989	-1.5854	0.112876	0.682192	Down
Hsa-Mir-142-P1-v1_5p	6957.95	-0.31396	0.202151	-1.5531	0.1204	0.682192	Down
Hsa-Mir-155_5p	1370.16	0.272934	0.175771	1.55278	0.120476	0.682192	Up
Hsa-Mir-15-P1b_3p*	217.868	-0.422485	0.272259	-1.55178	0.120716	0.682192	Down
Hsa-Mir-101-P2-v1_3p	4161.17	-0.471327	0.305677	-1.54191	0.123095	0.682192	Down
Hsa-Mir-101-P1-v1_3p	4056.56	-0.470709	0.30587	-1.53892	0.123823	0.682192	Down
Hsa-Mir-22-P1b_3p	3633.79	-0.300662	0.195585	-1.53725	0.124233	0.682192	Down
Hsa-Mir-17-P4c_5p	1042.18	-0.433148	0.284979	-1.51993	0.128529	0.682558	Down
Hsa-Mir-1249_3p	8.95109	0.891507	0.586748	1.5194	0.128661	0.682558	Up
Hsa-Mir-17-P1a_3p*	39.1218	-0.347936	0.23277	-1.49476	0.134976	0.697009	Down
Hsa-Mir-15-P2b_3p*	119.776	-0.496876	0.333146	-1.49147	0.135839	0.697009	Down
Hsa-Mir-21_5p	13854.5	0.215165	0.14593	1.47444	0.140362	0.708604	Up
Hsa-Mir-345_5p	176.984	-0.247733	0.17421	-1.42204	0.155015	0.770153	Down
Hsa-Mir-30-P2b_5p	360.73	-0.319057	0.227331	-1.40349	0.160471	0.774294	Down
Hsa-Mir-30-P2d_5p	360.69	-0.318651	0.227219	-1.4024	0.160796	0.774294	Down
Hsa-Mir-486_5p	401237	-0.498418	0.360331	-1.38322	0.166596	0.79007	Down
Hsa-Mir-598_3p	73.174	-0.327354	0.239216	-1.36844	0.171173	0.799659	Down
Hsa-Mir-361-v1_3p*	824.052	-0.178685	0.132149	-1.35214	0.176329	0.810831	Down
Hsa-Mir-744_5p	2866.29	0.343343	0.256697	1.33754	0.181046	0.810831	Up
Hsa-Mir-885_3p*	23.1171	0.713274	0.539544	1.32199	0.18617	0.810831	Up
Hsa-Mir-8-P1b_3p	142.218	0.299578	0.226857	1.32056	0.186647	0.810831	Up
Hsa-Mir-188-P2_5p	655.613	-0.351035	0.266193	-1.31873	0.187261	0.810831	Down
Hsa-Mir-29-P2d_3p	983.703	-0.266117	0.203053	-1.31058	0.19	0.810831	Down
Hsa-Mir-15-P1b_5p	2255.14	-0.333905	0.255754	-1.30557	0.191698	0.810831	Down
Hsa-Let-7-P1b_5p	1600.92	0.469626	0.365093	1.28632	0.198332	0.820246	Up
Hsa-Let-7-P2a2_3p*	6.52377	-0.501137	0.395284	-1.26779	0.204873	0.820246	Down
Hsa-Mir-30-P2a_5p	108.941	-0.390609	0.308247	-1.26719	0.205086	0.820246	Down
Hsa-Mir-144-v1_3p	620.351	-0.466824	0.36885	-1.26562	0.205649	0.820246	Down
Hsa-Mir-142-P1-v1_3p*	13076.6	0.380718	0.30173	1.26178	0.207027	0.820246	Up
Hsa-Mir-210_3p	77.7506	-0.294063	0.237338	-1.239	0.215345	0.842535	Down
Hsa-Mir-181-P1b_5p	1804.11	0.26952	0.223693	1.20487	0.228254	0.852256	Up
Hsa-Mir-181-P1a_5p	1804.04	0.26952	0.223727	1.20468	0.228325	0.852256	Up
Hsa-Mir-7-P2_3p*	9.78207	-0.44206	0.368726	-1.19888	0.230573	0.852256	Down
Hsa-Let-7-P2b3_5p	822.682	0.265571	0.221611	1.19837	0.230774	0.852256	Up
Hsa-Mir-1287_5p	53.3762	-0.238911	0.200363	-1.19239	0.233108	0.852256	Down
Hsa-Mir-15-P2d_5p	21.7288	-0.480282	0.403702	-1.1897	0.234166	0.852256	Down
Hsa-Mir-320-P1_3p	15980.8	-0.23408	0.197943	-1.18257	0.236981	0.852585	Down
Hsa-Mir-362-P2-v1_3p	117.398	-0.29439	0.250651	-1.1745	0.240195	0.854328	Down
Hsa-Mir-204-P2_5p	18.6954	0.424442	0.369265	1.14942	0.250381	0.857283	Up
Hsa-Mir-10-P1b-v1_5p	568.721	0.333479	0.29013	1.14941	0.250386	0.857283	Up
Hsa-Mir-550-P1_3p	23.5316	-0.410933	0.361355	-1.1372	0.255455	0.857283	Down
Hsa-Mir-550-P2a_3p	23.5316	-0.410933	0.361355	-1.1372	0.255455	0.857283	Down
Hsa-Mir-550-P2b_3p	23.5316	-0.410933	0.361355	-1.1372	0.255455	0.857283	Down
Hsa-Mir-2355_3p	26.184	-0.528736	0.469199	-1.12689	0.259789	0.857283	Down
Hsa-Mir-95-P1_3p	21.8321	-0.344903	0.306329	-1.12592	0.260198	0.857283	Down
Hsa-Mir-92-P2d_5p*	123.595	-0.313054	0.281262	-1.11303	0.265694	0.866273	Down
Hsa-Mir-188-P2_3p*	225.326	-0.315818	0.287499	-1.0985	0.271986	0.877644	Down
Hsa-Mir-21_3p*	21.6803	-0.340792	0.315668	-1.07959	0.280324	0.89126	Down
Hsa-Mir-30-P1a_5p	33076.7	-0.136807	0.127759	-1.07082	0.284251	0.89126	Down
Hsa-Mir-197_3p	595.276	0.288211	0.269615	1.06897	0.285081	0.89126	Up
Hsa-Mir-214-v1_3p	12.5856	0.483162	0.454351	1.06341	0.287595	0.89126	Up
Hsa-Mir-17-P1d_3p	2368.31	-0.282629	0.270775	-1.04378	0.296589	0.898714	Down
Hsa-Mir-144-v1_5p*	559.99	-0.412403	0.396609	-1.03982	0.298423	0.898714	Down
Hsa-Mir-1180_3p	599.458	-0.401564	0.387058	-1.03748	0.299513	0.898714	Down
Hsa-Mir-589_5p	76.632	-0.171142	0.165724	-1.0327	0.301746	0.898714	Down
Hsa-Mir-671_3p	81.2651	0.339397	0.330431	1.02714	0.304357	0.898714	Up
Hsa-Mir-328_3p	1843.31	0.246433	0.241979	1.01841	0.308484	0.902388	Up
Hsa-Mir-28-P2_5p	347.335	0.223766	0.224134	0.998357	0.318106	0.908857	Up
Hsa-Mir-1307_5p	114.943	-0.284964	0.289405	-0.984656	0.324793	0.908857	Down
Hsa-Mir-362-P4_3p	102.15	-0.259951	0.268172	-0.969345	0.332373	0.908857	Down
Hsa-Mir-3187_3p	43.4389	-0.289939	0.299108	-0.969343	0.332374	0.908857	Down
Hsa-Mir-181-P2a_5p	282.69	0.225414	0.233993	0.963334	0.33538	0.908857	Up
Hsa-Mir-203-v1_3p	50.1592	-0.410729	0.42673	-0.962505	0.335796	0.908857	Down
Hsa-Mir-628_3p	235.886	0.204913	0.217095	0.943889	0.345226	0.908857	Up
Hsa-Mir-1296_5p	34.6544	0.231757	0.24587	0.942597	0.345887	0.908857	Up
Hsa-Mir-324_3p*	260.18	-0.14157	0.150654	-0.939702	0.34737	0.908857	Down
Hsa-Mir-652_3p	325.69	0.136967	0.145824	0.939265	0.347595	0.908857	Up
Hsa-Mir-339_5p	1342.16	0.166765	0.179316	0.930004	0.352369	0.908857	Up
Hsa-Mir-221-P2a_5p	81.5773	0.296041	0.319733	0.925903	0.354496	0.908857	Up
Hsa-Mir-193-P1b_5p	289.18	0.340654	0.369076	0.922993	0.356011	0.908857	Up
Hsa-Mir-628_5p	55.6827	0.280932	0.304891	0.921418	0.356832	0.908857	Up
Hsa-Mir-576_5p	578.629	-0.275373	0.303232	-0.908127	0.363811	0.908857	Down
Hsa-Mir-769_5p	108.752	-0.226139	0.251346	-0.89971	0.368275	0.908857	Down
Hsa-Mir-194-P2_5p	270.822	-0.274145	0.305156	-0.898378	0.368984	0.908857	Down
Hsa-Let-7-P2c3_5p	8057.32	-0.159615	0.17805	-0.896463	0.370006	0.908857	Down
Hsa-Mir-320-P3_3p	169.94	0.286864	0.320464	0.895154	0.370705	0.908857	Up
Hsa-Mir-361-v1_5p	1549.2	-0.137265	0.154098	-0.890768	0.373054	0.908857	Down
Hsa-Mir-337-v1_5p	27.2881	-0.380263	0.42724	-0.890046	0.373441	0.908857	Down
Hsa-Mir-10-P2b_3p*	33.4472	-0.38048	0.429631	-0.885598	0.375834	0.908857	Down
Hsa-Mir-181-P2b_5p	300.634	0.201739	0.229264	0.879944	0.378889	0.908857	Up
Hsa-Mir-483_3p*	128.281	0.529506	0.610958	0.866681	0.386117	0.908857	Up
Hsa-Mir-130-P3b_5p*	49.1927	-0.164834	0.190996	-0.863023	0.388125	0.908857	Down
Hsa-Mir-126-P2-v1_3p	46553.5	0.204794	0.237657	0.861724	0.388839	0.908857	Up
Hsa-Mir-194-P1_5p	263.124	-0.260071	0.302113	-0.860841	0.389326	0.908857	Down
Hsa-Mir-26-P2_5p	18293.7	-0.153802	0.179676	-0.855998	0.391999	0.908857	Down
Hsa-Mir-362-P1_5p	25.2636	0.229358	0.273054	0.839973	0.400924	0.914086	Up
Hsa-Mir-590_3p	33.1029	-0.309776	0.368919	-0.839684	0.401085	0.914086	Down
Hsa-Mir-486_3p*	651.96	-0.27031	0.327975	-0.824177	0.409839	0.914086	Down
Hsa-Mir-30-P1d_3p*	296.951	0.202647	0.245914	0.824056	0.409908	0.914086	Up
Hsa-Mir-154-P5_3p	25.5603	0.381595	0.474879	0.803562	0.42165	0.914086	Up
Hsa-Mir-17-P2a_5p	302.414	-0.151219	0.189561	-0.797731	0.425026	0.914086	Down
Hsa-Mir-223_3p	50728.3	-0.214241	0.273209	-0.784165	0.432943	0.914086	Down
Hsa-Mir-324_5p	589.099	-0.232946	0.298687	-0.779902	0.435449	0.914086	Down
Hsa-Mir-181-P1b_3p*	167.552	0.146734	0.189359	0.7749	0.438399	0.914086	Up
Hsa-Mir-154-P7_5p	230.206	0.302538	0.391615	0.772537	0.439796	0.914086	Up
Hsa-Mir-766_5p*	12.0269	-0.366319	0.475763	-0.76996	0.441324	0.914086	Down
Hsa-Mir-362-P2-v1_5p*	4.70406	-0.381662	0.498712	-0.765295	0.444096	0.914086	Down
Hsa-Mir-362-P5_5p	4.70406	-0.381662	0.498712	-0.765295	0.444096	0.914086	Down
Hsa-Mir-143_5p*	17.6756	0.318843	0.417212	0.764221	0.444735	0.914086	Up
Hsa-Mir-148-P3_3p	322.732	0.215264	0.281881	0.763671	0.445063	0.914086	Up
Hsa-Mir-1306_5p	249.529	0.210444	0.275933	0.762664	0.445664	0.914086	Up
Hsa-Mir-27-P2_3p	1476.82	0.181369	0.240319	0.7547	0.450429	0.914086	Up
Hsa-Mir-32_5p	200.934	-0.201929	0.26774	-0.754199	0.45073	0.914086	Down
Hsa-Mir-651_5p	11.2717	-0.250091	0.333728	-0.749386	0.453625	0.914086	Down
Hsa-Mir-181-P1c_3p*	22.2496	-0.280646	0.378238	-0.741983	0.458098	0.914086	Down
Hsa-Mir-92-P1d_5p*	89.4296	-0.287981	0.389236	-0.739864	0.459383	0.914086	Down
Hsa-Mir-320-P4_3p	203.024	0.217264	0.296013	0.733969	0.462968	0.914086	Up
Hsa-Mir-29-P2b_3p	844.648	0.140659	0.191726	0.733645	0.463165	0.914086	Up
Hsa-Mir-335_5p	437.632	-0.190638	0.260537	-0.731712	0.464344	0.914086	Down
Hsa-Mir-339_3p	231.202	-0.09547	0.132347	-0.721363	0.470686	0.918272	Down
Hsa-Mir-505-v1_5p	93.5822	0.149261	0.207687	0.71868	0.472338	0.918272	Up
Hsa-Mir-331_3p	49.2966	-0.204357	0.287804	-0.710056	0.47767	0.922905	Down
Hsa-Mir-451_5p	65873.9	-0.22465	0.322045	-0.697573	0.485444	0.92694	Down
Hsa-Mir-22-P1b_5p*	31.6436	-0.24557	0.352226	-0.697194	0.485681	0.92694	Down
Hsa-Mir-584_5p	3731.16	0.160037	0.232604	0.68802	0.49144	0.930753	Up
Hsa-Mir-154-P6_3p	13.0568	-0.33937	0.496457	-0.683583	0.494238	0.930753	Down
Hsa-Mir-423_5p	41415.6	-0.217325	0.323813	-0.671143	0.50213	0.930753	Down
Hsa-Mir-342_5p*	25.2683	0.205586	0.30717	0.669289	0.503311	0.930753	Up
Hsa-Mir-432_5p	1659.94	0.295574	0.44406	0.665618	0.505655	0.930753	Up
Hsa-Mir-154-P18_3p	55.4454	-0.289232	0.436065	-0.663278	0.507153	0.930753	Down
Hsa-Mir-10-P3b_3p*	9.4328	0.244878	0.371148	0.659786	0.509391	0.930753	Up
Hsa-Mir-27-P3_3p	690.349	-0.205951	0.313686	-0.656553	0.511468	0.930753	Down
Hsa-Mir-130-P3b_3p	872.151	-0.134462	0.207959	-0.646578	0.517905	0.937019	Down
Hsa-Mir-148-P4_5p*	36.9784	-0.185533	0.290033	-0.639695	0.522371	0.939667	Down
Hsa-Mir-3200_3p	36.7551	-0.274189	0.441609	-0.620888	0.534674	0.956302	Down
Hsa-Mir-483_5p	671.182	0.314753	0.515959	0.610035	0.541839	0.958541	Up
Hsa-Mir-188-P3_5p	1665.54	-0.181333	0.297406	-0.609715	0.542051	0.958541	Down
Hsa-Mir-181-P1c_5p	28.7174	0.218924	0.362373	0.604139	0.545751	0.959664	Up
Hsa-Let-7-P2c2_5p	42123.1	0.0955271	0.161525	0.591409	0.554247	0.961926	Up
Hsa-Mir-23-P2_3p	1023.44	0.126822	0.223486	0.567472	0.570394	0.961926	Up
Hsa-Mir-425_5p	17835	-0.112784	0.199309	-0.565873	0.57148	0.961926	Down
Hsa-Mir-192-P2_5p	1931.35	-0.155127	0.276767	-0.560497	0.57514	0.961926	Down
Hsa-Mir-181-P2c_5p	84.2933	0.204884	0.367197	0.557968	0.576866	0.961926	Up
Hsa-Mir-17-P1d_5p	123.5	-0.160652	0.292039	-0.550103	0.582249	0.961926	Down
Hsa-Mir-143_3p	1336.22	0.172962	0.314973	0.549133	0.582914	0.961926	Up
Hsa-Mir-3138_3p	45.3814	0.157986	0.289954	0.544864	0.585847	0.961926	Up
Hsa-Mir-154-P36_5p*	26.0741	-0.219067	0.415133	-0.527704	0.597705	0.961926	Down
Hsa-Mir-8-P2a_3p	29.6928	-0.164051	0.315708	-0.519627	0.603324	0.961926	Down
Hsa-Mir-8-P2b_3p	52.7453	-0.17804	0.355372	-0.500996	0.616374	0.961926	Down
Hsa-Mir-10-P3b_5p	4402.48	0.131656	0.263991	0.498716	0.61798	0.961926	Up
Hsa-Mir-1301_3p	329.076	0.152697	0.3071	0.49722	0.619034	0.961926	Up
Hsa-Mir-154-P10_5p	1891.03	0.190596	0.38673	0.492841	0.622125	0.961926	Up
Hsa-Mir-425_3p*	496.281	-0.0996837	0.202366	-0.49259	0.622302	0.961926	Down
Hsa-Mir-24-P2_3p	2448.35	-0.123955	0.252375	-0.491152	0.623319	0.961926	Down
Hsa-Mir-24-P3_3p	2413.05	-0.122927	0.250395	-0.490933	0.623474	0.961926	Down
Hsa-Mir-629_5p	896.668	-0.119513	0.24452	-0.488766	0.625007	0.961926	Down
Hsa-Let-7-P2c1_3p*	1107.64	-0.0632889	0.129782	-0.487654	0.625795	0.961926	Down
Hsa-Mir-92-P1c_3p	75771.4	-0.146867	0.303688	-0.483612	0.628661	0.961926	Down
Hsa-Mir-17-P1c_5p	19.0355	0.198248	0.411831	0.481382	0.630245	0.961926	Up
Hsa-Let-7-P2a1_5p	32374.1	0.0981805	0.20525	0.478346	0.632404	0.961926	Up
Hsa-Let-7-P2a2_5p	32407.4	0.0980293	0.205251	0.477608	0.632929	0.961926	Up
Hsa-Mir-10-P2d_5p	100.96	0.186495	0.390647	0.4774	0.633078	0.961926	Up
Hsa-Mir-15-P1d_5p	9.73856	-0.256765	0.538014	-0.477246	0.633187	0.961926	Down
Hsa-Mir-1270_5p	37.923	-0.154373	0.325561	-0.474176	0.635374	0.961926	Down
Hsa-Let-7-P1d_5p	32360	0.0972798	0.205242	0.473976	0.635517	0.961926	Up
Hsa-Mir-140-P1-v1_5p*	269.976	0.067573	0.145375	0.46482	0.642061	0.961926	Up
Hsa-Mir-335_3p	104.995	0.146595	0.316536	0.463123	0.643276	0.961926	Up
Hsa-Mir-139_5p	83.8792	-0.132196	0.285874	-0.462428	0.643775	0.961926	Down
Hsa-Mir-362-P3_3p	384.042	-0.146391	0.322832	-0.453458	0.650219	0.961926	Down
Hsa-Mir-874_3p	47.878	-0.112798	0.252023	-0.447572	0.654462	0.961926	Down
Hsa-Mir-154-P3a-v1_3p	61.0054	0.196386	0.447365	0.438984	0.660673	0.961926	Up
Hsa-Mir-1343_3p	12.0203	-0.155655	0.355532	-0.437808	0.661526	0.961926	Down
Hsa-Mir-30-P1b_3p*	43.1386	0.128103	0.297596	0.43046	0.666861	0.961926	Up
Hsa-Mir-370_3p	307.924	0.172085	0.403112	0.426891	0.669459	0.961926	Up
Hsa-Mir-92-P1a_3p	78428	-0.124315	0.295311	-0.420965	0.673781	0.961926	Down
Hsa-Mir-199-P2-v1_3p	3317.13	0.11853	0.284494	0.416633	0.676947	0.961926	Up
Hsa-Mir-199-P3-v1_3p	3317.13	0.11853	0.284494	0.416633	0.676947	0.961926	Up
Hsa-Mir-574_3p	221.922	-0.107282	0.257948	-0.415904	0.67748	0.961926	Down
Hsa-Mir-10-P3d_5p	519.921	0.12243	0.295766	0.413941	0.678917	0.961926	Up
Hsa-Mir-199-P1-v1_3p	3329.47	0.117779	0.284822	0.413517	0.679228	0.961926	Up
Hsa-Mir-150_5p	5785.86	-0.122342	0.30007	-0.407711	0.683486	0.961926	Down
Hsa-Mir-338-P2_3p	50.2663	-0.179971	0.44465	-0.404749	0.685662	0.961926	Down
Hsa-Mir-1-P2_3p	46.2806	-0.172471	0.438201	-0.393588	0.693885	0.961926	Down
Hsa-Mir-431_5p	479.01	0.161652	0.414734	0.389773	0.696704	0.961926	Up
Hsa-Mir-26-P2_3p*	44.4062	0.0863321	0.222046	0.388803	0.697422	0.961926	Up
Hsa-Mir-320-P2b_3p	288.754	0.1061	0.273377	0.388107	0.697937	0.961926	Up
Hsa-Mir-320-P2a_3p	285.407	0.106416	0.274531	0.387629	0.698291	0.961926	Up
Hsa-Mir-10-P3c_5p	518.004	0.113913	0.296359	0.384375	0.7007	0.961926	Up
Hsa-Mir-223_5p*	744.893	0.0906694	0.241733	0.375082	0.7076	0.965951	Up
Hsa-Mir-190-P3_5p	78.9259	0.0779743	0.209829	0.371608	0.710184	0.965951	Up
Hsa-Mir-378_3p	865.16	-0.073315	0.199238	-0.367977	0.71289	0.965951	Down
Hsa-Mir-197_5p*	7.90159	-0.151176	0.418177	-0.361512	0.717717	0.966241	Down
Hsa-Mir-491_5p	74.0377	0.0892849	0.251634	0.35482	0.722724	0.966241	Up
Hsa-Mir-154-P15_5p	140.921	0.155749	0.454556	0.342641	0.731869	0.966241	Up
Hsa-Let-7-P2b2_3p*	37.6852	0.0884768	0.260038	0.340246	0.733671	0.966241	Up
Hsa-Mir-132-P1_5p*	4.56391	0.140397	0.414672	0.338575	0.73493	0.966241	Up
Hsa-Mir-146-P4_5p	20558.9	0.1091	0.324873	0.335824	0.737004	0.966241	Up
Hsa-Mir-191_5p	20832.6	-0.0614979	0.184202	-0.333861	0.738485	0.966241	Down
Hsa-Mir-10-P2b_5p	1040.19	0.09616	0.296037	0.324825	0.745314	0.966241	Up
Hsa-Mir-378_5p*	29.2411	-0.0913758	0.287468	-0.317864	0.750588	0.966241	Down
Hsa-Mir-17-P2a_3p*	149.372	-0.10029	0.327404	-0.30632	0.759361	0.966241	Down
Hsa-Mir-192-P1_5p	32.0364	-0.126972	0.416122	-0.305133	0.760265	0.966241	Down
Hsa-Mir-3173_5p	40.918	-0.0833616	0.279403	-0.298357	0.765431	0.966241	Down
Hsa-Mir-154-P5_5p	92.7276	-0.120753	0.404748	-0.298341	0.765443	0.966241	Down
Hsa-Mir-221-P2a_3p	11799.7	-0.0812809	0.27304	-0.297689	0.765941	0.966241	Down
Hsa-Mir-145_5p	111.867	-0.122105	0.416108	-0.293446	0.769181	0.966241	Down
Hsa-Mir-17-P1a_5p	1070.66	0.0518022	0.182747	0.283464	0.776821	0.966241	Up
Hsa-Mir-1306_3p*	95.3497	0.113894	0.409508	0.278126	0.780916	0.966241	Up
Hsa-Mir-190-P1_5p	153.102	0.0765919	0.27753	0.275977	0.782566	0.966241	Up
Hsa-Mir-154-P17_3p	49.731	-0.111353	0.443346	-0.251164	0.801687	0.966241	Down
Hsa-Mir-23-P2_5p*	14.8345	-0.0859963	0.343542	-0.250322	0.802338	0.966241	Down
Hsa-Mir-10-P1c-v1_5p	739.331	0.0437628	0.175224	0.249753	0.802778	0.966241	Up
Hsa-Mir-296_5p	55.6261	-0.0772665	0.326868	-0.236384	0.813134	0.966241	Down
Hsa-Mir-23-P3_3p	5605.28	-0.0622812	0.266048	-0.234098	0.814909	0.966241	Down
Hsa-Mir-493_5p	55.2043	-0.101573	0.442034	-0.229786	0.818258	0.966241	Down
Hsa-Mir-193-P2a_3p	12.3696	-0.0892191	0.399751	-0.223187	0.82339	0.966241	Down
Hsa-Mir-193-P2b_3p	12.3696	-0.0892191	0.399751	-0.223187	0.82339	0.966241	Down
Hsa-Mir-33-P3_5p	10.6475	0.0772378	0.351096	0.21999	0.825879	0.966241	Up
Hsa-Mir-224_5p	1728.39	0.0788535	0.374219	0.210715	0.83311	0.966241	Up
Hsa-Mir-148-P1_3p	4918.69	0.042074	0.202888	0.207375	0.835717	0.966241	Up
Hsa-Mir-150_3p*	31.203	-0.0701325	0.348473	-0.201257	0.840498	0.966241	Down
Hsa-Mir-154-P9_3p	160.557	-0.0748516	0.385441	-0.194197	0.846021	0.966241	Down
Hsa-Mir-30-P1b_5p	787.988	-0.0454497	0.238045	-0.190929	0.848581	0.966241	Down
Hsa-Mir-154-P15_3p*	386.616	0.0752413	0.394079	0.190929	0.848581	0.966241	Up
Hsa-Mir-181-P1a_3p*	74.4259	-0.0461743	0.250138	-0.184595	0.853547	0.966241	Down
Hsa-Mir-493_3p*	59.8176	0.0771888	0.420743	0.183458	0.854439	0.966241	Up
Hsa-Mir-766_3p	44.0825	0.0616029	0.344645	0.178743	0.85814	0.966241	Up
Hsa-Mir-96-P3-v1_5p	1622.86	-0.0750811	0.426465	-0.176054	0.860251	0.966241	Down
Hsa-Mir-199-P1-v1_5p*	101.563	-0.0593786	0.344301	-0.172462	0.863075	0.966241	Down
Hsa-Mir-199-P3-v1_5p*	101.563	-0.0593786	0.344301	-0.172462	0.863075	0.966241	Down
Hsa-Mir-134_5p	771.593	0.067688	0.407711	0.16602	0.868142	0.966241	Up
Hsa-Mir-154-P3b_3p	115.652	-0.0658323	0.3986	-0.165159	0.868819	0.966241	Down
Hsa-Mir-3200_5p*	26.9	-0.0796127	0.488673	-0.162916	0.870584	0.966241	Down
Hsa-Mir-205-P4_5p	102.014	-0.0578508	0.355189	-0.162874	0.870618	0.966241	Down
Hsa-Mir-671_5p	192.66	0.0487887	0.30143	0.161858	0.871418	0.966241	Up
Hsa-Mir-126-P2-v1_5p*	5769.58	-0.0336114	0.209872	-0.160152	0.872761	0.966241	Down
Hsa-Mir-92-P2c_3p	1824.02	-0.0482261	0.301993	-0.159693	0.873123	0.966241	Down
Hsa-Mir-146-P1_5p	974.892	-0.0422847	0.267123	-0.158297	0.874223	0.966241	Down
Hsa-Mir-17-P2c_3p*	13.6653	-0.0750298	0.478474	-0.156811	0.875394	0.966241	Down
Hsa-Mir-1294_5p	163.193	-0.055558	0.36571	-0.151918	0.879251	0.966241	Down
Hsa-Mir-340_5p	250.43	0.0397232	0.263384	0.150818	0.880119	0.966241	Up
Hsa-Mir-1277_5p	60.9713	0.0665344	0.464506	0.143237	0.886103	0.966241	Up
Hsa-Mir-146-P1_3p*	36.0391	0.026889	0.205205	0.131035	0.895748	0.966241	Up
Hsa-Mir-374-P1_5p	305.002	-0.0306309	0.243582	-0.125752	0.899928	0.966241	Down
Hsa-Mir-191_3p*	73.1117	0.0368898	0.29526	0.12494	0.900571	0.966241	Up
Hsa-Mir-148-P4_3p	1849.51	-0.019485	0.162937	-0.119586	0.904811	0.966241	Down
Hsa-Mir-28-P2_3p	10320.6	0.0257508	0.218085	0.118077	0.906007	0.966241	Up
Hsa-Mir-375_3p	380.894	-0.0456649	0.389409	-0.117267	0.906648	0.966241	Down
Hsa-Mir-185_3p*	247.155	0.0195507	0.170885	0.114409	0.908914	0.966241	Up
Hsa-Mir-92-P1d_3p	764.725	-0.0412162	0.36099	-0.114176	0.909099	0.966241	Down
Hsa-Mir-103-P4_3p	10314.5	-0.0178734	0.157122	-0.113755	0.909432	0.966241	Down
Hsa-Mir-103-P2_3p	10334.1	-0.0176769	0.157328	-0.112357	0.91054	0.966241	Down
Hsa-Mir-26-P1_3p*	18.0093	0.0421289	0.379731	0.110944	0.911661	0.966241	Up
Hsa-Mir-374-P2_5p	140.612	0.0286077	0.260959	0.109625	0.912707	0.966241	Up
Hsa-Mir-154-P36_3p	1733.22	0.0435473	0.41044	0.106099	0.915504	0.966241	Up
Hsa-Let-7-P2b2_5p	130853	-0.0304526	0.310455	-0.0980903	0.921861	0.966241	Down
Hsa-Mir-505-v1_3p*	38.5669	0.0220558	0.26207	0.0841599	0.932929	0.966241	Up
Hsa-Mir-1307_3p*	2726.33	0.0220203	0.289274	0.0761227	0.939321	0.966241	Up
Hsa-Mir-196-P1_5p	342.89	0.0171953	0.226596	0.0758854	0.93951	0.966241	Up
Hsa-Mir-342_3p	5844.48	-0.0140707	0.190578	-0.0738315	0.941144	0.966241	Down
Hsa-Mir-28-P1_3p	1225.25	-0.0200559	0.27206	-0.0737184	0.941234	0.966241	Down
Hsa-Mir-96-P2_5p	3227.49	-0.0324909	0.457984	-0.0709433	0.943443	0.966241	Down
Hsa-Mir-127_3p	599.088	0.029203	0.42034	0.0694747	0.944612	0.966241	Up
Hsa-Mir-326_3p	406.634	0.0211781	0.305863	0.0692406	0.944798	0.966241	Up
Hsa-Mir-760_3p	76.7887	0.0228012	0.331436	0.0687952	0.945153	0.966241	Up
Hsa-Mir-96-P1_5p	434.894	-0.0267774	0.389809	-0.0686935	0.945234	0.966241	Down
Hsa-Mir-154-P23_3p	303.679	0.0250043	0.426	0.0586955	0.953195	0.966241	Up
Hsa-Mir-26-P1_5p	10870.2	-0.0132339	0.227278	-0.0582279	0.953567	0.966241	Down
Hsa-Mir-1-P1_3p	52.7099	0.0253725	0.438823	0.0578195	0.953892	0.966241	Up
Hsa-Mir-26-P4_5p	11089	-0.00993471	0.228513	-0.0434754	0.965323	0.974664	Down
Hsa-Mir-154-P13-v1_5p	58.1142	0.0151199	0.408852	0.0369814	0.9705	0.976741	Up
Hsa-Mir-139_3p*	358.539	0.00632961	0.351536	0.0180056	0.985634	0.988793	Up
Hsa-Mir-1-P3_3p	47.6207	0.0040062	0.441157	0.00908111	0.992754	0.992754	Up
